# 1 Spontaneous eye-movements during eyes-open rest 2 reduce resting-state-network modularity by 3 increasing visual-sensorimotor connectivity

4 Cemal Koba<sup>1</sup>, Giuseppe Notaro<sup>2</sup>, Sandra Tamm<sup>3,4,5</sup>, Gustav Nilsson<sup>3,4</sup>, and Uri  
5 Hasson<sup>2,\*</sup>

6 <sup>1</sup>MoMiLab Research Unit, IMT School for Advanced Studies Lucca, Lucca, Italy

7 <sup>2</sup>Center for Mind/Brain Sciences (CIMeC), The University of Trento, Italy

8 <sup>3</sup>Department of Clinical Neuroscience, Karolinska Institutet, Sweden

9 <sup>4</sup>Department of Psychology, Stockholm University, Sweden

10 <sup>5</sup>Department of Psychiatry, Oxford University, UK

11 \*Correspondence: [uri.hasson@unitn.it](mailto:uri.hasson@unitn.it)

## 12 ABSTRACT

13 During wakeful rest, individuals make small eye movements when asked to fixate. We examined how these endogenously-driven oculomotor patterns impact topography and topology of functional brain networks. We used a dataset consisting of eyes-open resting-state (RS) fMRI data with simultaneous eye-tracking (Nilsson et al., 2016). The eye-tracking data indicated minor movements during rest, on the order of 1.0 degree on average when analyzed over 2sec epochs, which correlated modestly with RS BOLD data. However, the eye-tracking data correlated well with echo-planar imaging (EPI) time series sampled from the area of the Eye-Orbit (EO-EPI), which is a signal previously used to identify eye movements during exogenous saccades and movie viewing. We found that EO-EPI data correlated with activity in an extensive motor and sensory-motor network, but also some components of the dorsal attention network including the frontal and supplementary eye fields. Partialling out variance related to EO-EPI from RS data reduced connectivity, primarily between sensory-motor and visual areas. For three different network sparsity levels, the resulting RS connectivity networks showed higher modularity, lower mean connectivity strength, and lower mean clustering coefficient. Our results highlight new aspects of endogenous eye movement control during wakeful rest. They show that oculomotor-related contributions form an important component of RS network topology, and that those should be considered in interpreting differences in network structure between populations, or as a function of different experimental conditions.

## 14 Introduction

15 The study of human brain activity during resting state (RS) is of considerable interest in both basic and clinical brain research.  
16 For mechanistically-oriented perspectives, RS activity patterns identify constraints that may govern task-evoked activity as seen  
17 by relations between RS connectivity and inter-individual differences in various cognitive tasks (e.g., Kelly, Uddin, Biswal,  
18 Castellanos, & Milham, 2008; Rosenberg, Hsu, Scheinost, Constable, & Chun, 2018). And because RS connectivity is related  
19 to structural connectivity (Honey et al., 2009; Mišić et al., 2016), it is considered an important mediator between anatomical  
20 organization and task-evoked activity. From the perspective of predictive models of interindividual differences in healthy and  
21 clinical populations, the quantification of RS features (using time-domain, network-based analyses, spatiotemporal clustering,  
22 control-based approaches, to name a few) is used for machine-learning or statistical learning. This has proved promising  
23 in contexts such as prediction of IQ (Dubois, Galdi, Paul, & Adolphs, 2018), personality (e.g., Nostro et al., 2018), or the  
24 likelihood of developing clinical conditions (e.g., de Vos et al., 2018).

25 RS data measured via fMRI reflect endogenous neural activity, but also additional sources such as physiological artifacts  
26 (e.g., cardiac and respiratory effects, Birn, 2012; J. Chen et al., 2020), or head and body motion (e.g., Parkes, Fulcher, Yücel,  
27 & Fornito, 2018). For machine learning, these non-neural effects on the BOLD signal may be informative (e.g., motion-related  
28 patterns could differ across populations (e.g., Zacà, Hasson, Minati, & Jovicich, 2018). However, motion and physiological  
29 effects complicate drawing conclusions about brain systems mediating endogenous information-computation during wakeful  
30 rest. For this reason, researchers often remove effects of motion and physiology from RS data prior to analysis.

31 Here we examined how RS connectivity is related to a different factor, which is eye movement during rest. For purposes  
32 of understanding endogenous computations, spontaneous eye-movement at rest straddles the space between an interesting  
33 neurobiological phenomenon reflecting the output of endogenous activity and a nuisance factor reflecting motor activity. On

34 one hand, eye-movement can be considered a truly integral component of wakeful rest, because at minimum, retinal input  
35 is continuously refreshed to minimize adaptation. On the other hand, oculomotor control differs from prototypical covert,  
36 non-motor processes exactly because motor control involves planning, execution, efference copy, feedback and correction (e.g.,  
37 West, Welsh, & Pratt, 2009). Oculomotor-control during rest may therefore instantiate coordination between brain systems that  
38 otherwise present modest levels of coordination.

39 Statistically, eye movements during rest could produce stronger connectivity between regions. Perhaps more importantly, it  
40 could produce a more integrated (less-modular) view of RS connectivity networks, because eye movement is supported by a  
41 widely distributed fronto-parietal network and occipital regions (e.g., Balslev, Albert, & Miall, 2011; Mort et al., 2003). From a  
42 theoretical perspective, identifying neural systems controlling eye movement during rest could allow better partitioning between  
43 relatively more 'active', (oculo)motor-related aspect of RS as opposed to other more covert, non-motor-related aspects of RS.  
44 Finally, eye-movement themselves could be a possible confounder when studying controls and clinical groups that differ in  
45 oculomotor control including Autism (e.g., Takarae, Minshew, Luna, Krisky, & Sweeney, 2004) or Parkinson's Disease (e.g.,  
46 Pretegianni & Optican, 2017; Zhang et al., 2018).

## 47 **Current knowledge**

48 There is relatively little prior work on the relationship between eye movements and RS activity. Using fMRI, Fransson,  
49 Flodin, Seimyr, and Pansell (2014) studied neural correlates of horizontal or vertical guided fixations, as well as spontaneous  
50 fixations during RS. Guided fixations produced activity in systems typically involved in oculomotor movement including  
51 visual cortex, frontal eye fields (FEF), supplementary motor area (SMA), cerebellum, and a few other regions. To quantify  
52 correlates of spontaneous eye movement during RS they derived a gaze-velocity time series from the eye tracking data, reduced  
53 its dimensionality using PCA, convolved the resulting timeseries with a hemodynamic response function and used the result  
54 as a regressor in a whole-brain analysis. Interestingly, this latter analysis identified fewer regions that did not overlap with  
55 those found for guided saccades, and which were all associated with the Default Mode Network (DMN): the posterior cingulate  
56 cortex (PCC) and dorsomedial prefrontal cortex (dmPFC). As the authors noted (p. 3833), "at first glance it would seem more  
57 likely to expect the neuronal control for slow changes in eye position during fixation to be localized to visual cortices and  
58 attention-related cortical networks". It is unclear how slow fluctuations in the DMN impact eye movement.

59 McAvoy et al. (2012) used Electro-oculography (EOG) to monitor eye movement during fixation, in an analysis based on a  
60 relatively small sample ( $N = 9$ ). Using the EOG they separated blinks from other eye movement during eyes-open RS. In the  
61 analysis of EOG during RS fixation they identified brain systems correlated with blinks, but no brain systems where activity  
62 correlated with other types of eye movements.

63 Yellin, Berkovich-Ohana, and Malach (2015) examined correlations between blood oxygen level-dependent (BOLD)  
64 fluctuations during rest and pupil size. They identified widespread negative correlations in sensory-motor areas and temporal  
65 areas, and positive correlations in the DMN. The study did not evaluate BOLD correlates of gaze location or velocity. However,  
66 it is possibly related to understanding systems related to spontaneous eye movement, because pupil-size measurements are  
67 known to be confounded with the deviation of the pupil from the center of camera view. That is, eye trackers will mis-report  
68 systematically decreasing pupil-size values – for the exact same pupil size – as a function of the deviation of pupil from  
69 camera-axis (Hayes & Petrov, 2016).<sup>1</sup>

70 Ramot et al. (2011) used EOG to determine BOLD correlates of spontaneous eye movements during an eyes-closed  
71 condition. The relation to eyes-open oculomotor control is unclear, as eyes-closed RS conditions produce different activity (e.g.,  
72 Marx et al., 2003) and connectivity (e.g., McAvoy et al., 2012) patterns. Furthermore, saccades made under closed eye lids  
73 have different trajectories than those made with eyes open in complete darkness (Becker & Fuchs, 1969). For this reason we  
74 consider prior studies examining RS activity during eyes-open condition as more relevant for current work.

75 In addition, numerous neuroimaging studies have used various types of tasks, including visually-guided saccades, memory-  
76 guided saccades, anti-saccades and so-called "voluntary" saccades (either pre-cued [endogenous control] or freely initiated).  
77 However these studies used explicit tasks rather than study naturally occurring oculomotor control during eyes-open RS.  
78 Perhaps the essential difference is that controlled studies oftentimes orient the saccade towards, or away from a presented target  
79 (pro- vs anti-saccade) and for this reason the brain systems identified could mediate visual detection and attention processes  
80 that have no parallel during rest. In a neuroimaging study demonstrating this point, the authors (Brown, Goltz, Vilis, Ford, &  
81 Everling, 2006) required participants to saccade either towards a stimulus (prosaccade), away from a stimulus (antisaccade),  
82 or maintain fixation while inhibiting an orienting saccade (no-go). They documented numerous regions, including FEF, IPS,  
83 cingulate cortex and precuneus, all showing highly similar activation patterns for both prosaccade and no-go trials. The authors  
84 wrote this suggests that "BOLD signal in cortical saccade regions might predominantly reflect visual detection and attention  
85 processes rather than saccade generation or inhibition. . ." For this reason, it is unclear to what extent brain systems identified  
86 in typical studies of saccades are strongly involved in saccade control during the resting state.

## 87 **Specific aims**

88 The two aims of our current study were: 1) to identify brain systems associated with endogenously driven eye movements  
89 during rest, and conjointly, 2) to determine how removal of eye-movement related activity impacts resting-state connectivity.  
90 We quantified eye movement during rest using both eye-tracking, and EPI data extracted from the eye orbit area. We validated  
91 the relationship between different features of oculomotor movement (pupil size, gaze velocity, gaze location) and Eye Orbit EPI  
92 time series (EO-EPI) during rest. We then evaluated how removal of eye-related activity, as manifested in EO-EPI, impacts the  
93 topography and topology of RS networks.

## 94 **Methods**

### 95 **Dataset**

96 We used resting state data from the Sleepy Brain study (Nilsson et al., 2016).<sup>2</sup> Full details of the dataset and imaging  
97 parameters are given in Nilsson et al. (2016) and here we provide only the main details. Data were collected from 86  
98 participants on a 3T MRI scanner (Discovery 750, General Electric) using an 8-channel head coil. Each participant was scanned  
99 on two different days. In each scanning session, a T1 structural image, two resting state functional EPI scans, and three  
100 task-related functional scans (emotional mimicry, empathy for pain, emotional reappraisal) were acquired. Our analyses rely  
101 only on the structural and resting-state scans.

102 For the structural (T1) images, the relevant properties were as follows: slice thickness 1mm, sagittal orientation, whole  
103 brain acquisition. For the resting state EPI images: slice thickness 3mm no gap, axial orientation, 49 slices covering the entire  
104 brain, interleaved acquisition inferior to superior,  $TE = 30$ ,  $TR = 2.5s$ , flip angle  $75^\circ$ .

105 Four resting-state data sets were acquired for each participant; two runs on each of two scanning days. In one of the two  
106 days, data were collected when participants were sleep deprived, and we did not analyze these data. Of the remaining two RS  
107 runs, one was typical, where participants were asked to fixate on a white cross presented a gray background for 8 minutes. The  
108 second run was quasi-rest in that in addition to fixation, it included self-rated sleepiness probes every two minutes. We only  
109 analyzed data from the typical RS session. To summarize, we processed one RS run per participant, which was a typical RS  
110 scan acquired in absence of sleep deprivation. Three participants did not provide these runs so 83 participants were included in  
111 our initial sample. Participants belonged to two age groups: 20–30 and 65–75 y.o.a.

### 112 **Pre-processing of eye tracking data**

113 Eye tracking data were available for 77 of the 83 participants for which we analyzed the RS data. Participants were required to  
114 maintain their gaze on a central fixation cross for the duration of the 8 min scan. Right eye movement and pupil size were  
115 recorded using an Arrington Research Viewpoint system integrated into head-mounted goggles. Eye data were sampled at 60  
116 Hz. Participants were monitored during the experiment to ensure that they did not have prolonged eye closures ( $> 5s$ ).

117 When analyzing these data we observed a substantial proportion of missing values, likely due to loss of pupil tracking  
118 during the task. We therefore implemented a quality assurance procedure as detailed below. As recommended by the instrument  
119 manufacturer, we detected eyeblinks by identifying local deviations (anomalies) in the values of pupil sizes. Specifically, we  
120 defined blink artifacts as cases where *i*) the ratio of the pupil width to pupil height (pupil aspect) was too excessive, or when one  
121 of the pupil dimensions exceeded the validity range that, by visual inspection, was in the range 0.1-0.5 (instrumental arbitrary  
122 units). To avoid to reliance on arbitrary thresholds, we defined an artifact function as the sum of the following three functions  
123 (each normalized to its maximum value). In these equations,  $f_1$  is the pupil aspect ratio, and  $f_2$  and  $f_3$  diverge when one pupil  
124 dimension approach the boundaries of the validity range 0.1-0.5.

$$f_1 = \text{pupilwidth} / \text{pupilheight} \quad (1)$$

$$f_2 = 1 / (\text{pupilwidth}^2) + 1 / (\text{pupilheight}^2) \quad (2)$$

$$f_3 = 1 / ((\text{pupilwidth} - .6)^2) + 1 / ((\text{pupilheight} - .6)^2) \quad (3)$$

125 After transforming the using these functions, we defined artifacts as sharp peaks in the resulting time series. In addition, we  
126 defined blinks as artifacts whose duration was 100–400 msec. After removing time points containing artifacts, we considered  
127 the time series of gaze locations. To limit the influence of the noise due to data acquisition failures we only included data  
128 from participants with gaze variance below an arbitrary value of 0.1 radians. Consequently, we analyzed data from 32 (of  
129 77) participants. For these, the proportion of artifacts was on average  $18 \pm 2\%$ ; blinks occurred with an average period of  
130  $2.36 \pm 0.21$  sec.

### 131 **Pre-processing of fMRI data and creation of eye-orbit EPI regressors**

132 We include the analysis workflow described below as supplementary materials, also available [online](#).

133 First, we applied brain extraction and tissue segmentation (Gray Matter, White Matter, CSF) to the structural T1 images  
134 using the *antsBrainExtraction* function of ANTs software (Avants, Tustison, & Song, 2011). We used ANTs for all registration  
135 routines in our pipeline. We registered each participant's structural image to standard space using non-linear registration (ICBM  
136 2009 non-linear asymmetric template; Fonov, Evans, McKinstry, Alml, & Collins, 2009), and saved the inverse of the warps.  
137 We also registered the structural and functional images using affine transformation. We used the combination of these two  
138 transformations to align data from each participant's original space to common space, or vice versa, in a single step.

139 To delineate each participant's "eye orbit" area we first marked this area on the common-space template. We then transformed  
140 this mask to each participant's original space, and made any additional modifications (if needed) therein. Specifically, we  
141 delineated anatomical masks of the "eye orbit" area in common space using MRICRON (Rorden, Karnath, & Bonilha, 2007),  
142 for which we used an MNI template provided with FSL (Jenkinson, Beckmann, Behrens, Woolrich, & Smith, 2012). Both  
143 eye orbits were included in the mask. The masks' location was transformed to each participant's individual space using  
144 the combination of T1→subject space matrices and inverse of the T1→MNI matrices mentioned above. We also created  
145 cerebral-spinal fluid (CSF) and white matter masks in MNI space and transformed them to individual space, where they were  
146 eroded by one voxel from each direction to be more conservative. We then extracted the mean time series from these white  
147 matter and CSF masks. These were used as nuisance regressors in an initial regression (details below).

148 We used AFNI (Cox, 1996) for analyzing the functional RS images. We implemented the following steps: slice time  
149 correction, motion correction (base image: first volume of the run), and band-pass filtering (0.01 – 0.1Hz). To remove other  
150 nuisance sources of variance from the functional time series we implemented preliminary data-cleaning using regression with  
151 the following regressors: *i*) motion parameters estimated during motion correction, *ii*) mean white matter and CSF time series,  
152 *iii*) and frame-wise displacement values (included in the model as a regressor). We considered the residuals of this regression as  
153 a "cleaned" time series that was the starting point for further analyses.

154 To improve signal to noise of the subsequent regression models which were of primary interest, we then spatially-smoothed  
155 the cleaned time series with a 6mm FWHM kernel. From this time series we also derived an Eye-Orbit EPI regressor, which was  
156 defined as the mean time series from both eye-orbit masks, after spatial smoothing, which we refer to as  $EYE_{raw}$ . We convolved  
157 the  $EYE_{raw}$  with an HRF basis function (Using AFNI's *waver* command), producing a  $EYE_{conv}$  time series. In separate analyses  
158 we used either  $EYE_{raw}$  or  $EYE_{conv}$  as "seed" regressors, to identify EO-EPI-correlated brain areas.

## 159 **Determining correlation between eye-tracking measures and EO-EPI time series**

160 We were interested in the relationship between several measures of eye movement and the EPI time series sampled from the  
161 eye-orbit regions (EO-EPI series). We derived 12 time series from the eye-tracking data were: the measured gaze location,  
162  $GazeX$  and  $GazeY$  (mean normalized for horizontal center per participant), their squared values, their temporal derivatives  
163 ( $vel\_GazeX$ ,  $vel\_GazeY$ ), gaze amplitude:  $GazeX^2 + GazeY^2$ , gaze power:  $vel\_GazeX^2 + vel\_GazeY^2$ ,  $Pupil\_size$  (de-meant),  
164 its first derivative  $vel\_Pupil\_size$ , and squared value  $Pupil\_size^2$ . We were also interested in the *blink function* (coding for 1  
165 whenever a blink was present; 0 otherwise), but we determined the relation between blinks and EO-EPI in a different manner as  
166 detailed below.<sup>3</sup>

167 For each of the 12 eye-tracking quantities mentioned above (with the exception of blinks) we performed the following  
168 procedure: We first down-sampled the time series to the fMRI frequency rate (0.4 Hz). Rather than a-priori assume that  
169 the relation between the eye-tracker data and EO-EPI is mediated by a typical hemodynamic response function, we used a  
170 simple statistical learning approach to estimate and validate this relationship. Specifically, we calculated a kernel function to  
171 describe the relation between the eye tracking quantity and the EO-EPI envelope. To calculate a kernel, we implemented the  
172 following procedure. First, for each oculomotor time series we considered as meaningful oculomotor 'events' the top 10% of  
173 the peak-values in the given series. Second, we calculated the mean EO-EPI signal in the interval  $[-10, 10]$  seconds around  
174 those peak events. For each participant, the triggered mean was normalized to that participant's absolute maximum value, in  
175 this way producing the participant's event triggered average (ETA). Finally, for each participant, we used the mean of the ETAs  
176 calculated from *all other* participants as the kernel to apply to the left-out participant's data (this maintained independence of  
177 estimation and testing). The kernel was convolved with the eye tracking time series, and a correlation with EO-EPI computed.  
178 The resulting correlation values (32 in all) were then Fisher-Z transformed and analyzed on the group level using a T-test.

179 We used a different approach to evaluate the relation between blinks and EO-EPI dynamics. The blink time series was sparse  
180 and binary, with '1' coding blink presence. We down-sampled this time series to consecutive 2.5 sec windows, assigning to  
181 each window the value 1 if at least one blink was coded in the original series. For each participant we computed a blink-related  
182 event-triggered-average by averaging the EO-EPI data around each blink (as described above). To determine the statistical  
183 significance of blinks and EO-EPI we evaluated the reliability of the ETAs across participants: We calculated for each participant  
184 the correlation between his/or own ETA and the average of the ETAs of all the other subjects. We then tested the distribution of  
185 these correlation values at the group level using a T-test.

## 186 **Statistical Inference for fMRI analyses**

### 187 **Correlates of Eye-tracking metrics**

188 We examined whole-brain RS correlations with several eye tracking measures: *GazeX*, *GazeX*<sup>2</sup>, *vel\_GazeX*, *vel\_GazeX*<sup>2</sup>,  
189 *Pupil\_size*, and *blink function*. The BOLD data modeled were “cleaned” time series from which only typical artifact sources  
190 were removed. We implemented two modeling approaches: In the first, we resampled each eye-tracking measure of interest to  
191 the sampling resolution of the MR acquisition ( $Hz = 0.4$ ) and convolved the result with canonical HRF via AFNI’s Waver  
192 function to construct a regressor. In the second, we used a Finite Impulse Response (FIR) function modeling approach where  
193 the BOLD impulse response was estimated using six tent functions (using AFNI’s *tent* basis function). This approach does not  
194 assume a fixed shape. From these estimates, we averaged the first three beta coefficients (corresponding to 0 – 7.5sec post  
195 eye-tracker dynamics) and propagated the value to a group-level analysis. Family wise error correction was implemented using  
196 FSL’s TFCE implementation.

### 197 **Correlates of EO-EPI Regressors**

198 Beta values associated with *EYE<sub>conv</sub>* or *EYE<sub>raw</sub>* were transformed to MNI space. To identify clusters where these beta values  
199 were significantly positive or significantly negative we computed voxel-wise statistics (Wilcoxon signed-rank test) and then  
200 implemented cluster-level control for family-wise-error using permutations as described below. We used a non-parametric test  
201 because the relevant Beta values data did not satisfy typical parametric assumptions.

202 We defined statistically-significant clusters as ones where the statistical significance (uncorrected) at the single voxel level  
203 was below  $p = .01$ , and where the cluster size (volume) passed a value determined from the sampling distribution we derived  
204 using the following permutation procedure. In each of 10,000 permutations, we reversed the signs of 42 of the 83 datasets (i.e.,  
205 the labels for conditions *EYE<sub>conv</sub>* and *EYE<sub>raw</sub>* were flipped for these participants), and we implemented a Wilcoxon signed-rank  
206 test (Siegel & Castellan, 1956) to identify all clusters consisting of voxels where the statistical significance of the difference  
207 from chance (zero; 0) exceeded  $p < .01$  and where all values were positive (we limited to positive values so that the resulting  
208 clusters could not combine both negative and positive values, as our main analysis also probed for clusters where all values  
209 were either positive or negative). We saved the largest cluster size from each permutation, and the resulting set of 10,000 values  
210 of largest-cluster sizes defined the sampling distribution. The 95% percentile rank entry of the sampling distribution served as  
211 the critical value. This value was used to define statistically-significant clusters in the experimental data.

212 To evaluate whether significant EO-EPI correlates were found in areas dominated by artifacts, we calculated temporal signal  
213 to noise ratio (tSNR) for each participant. To create tSNR map for each participant, we used the raw functional images (before  
214 applying any signal processing steps), but after removal of the initial 10 stabilization images. We divided the absolute mean  
215 value of each voxel by its standard deviation. We then applied the statistically significant clusters found for *EYE<sub>raw</sub>* and *EYE<sub>conv</sub>*  
216 series as masks to determine *mean* of the tSNR in each statistically significant spatial cluster. The motivation for this analysis  
217 was a prior report (W. Chen & Zhu, 1997) showing that Nyquist ghosting artifacts can propagate eye signals into midbrain  
218 areas (in the case of axial acquisition). Two MR physicists examined the QA reports produced by the scanner and did not find  
219 evidence for ghosting. However, we still wanted to evaluate if any EO-EPI whole-brain correlates were found in regions with  
220 low tSNR.

221 We defined the frontal eye fields (FEF) and supplementary eye fields (SEF) as independent Regions of Interest and for each  
222 each we examined correlations with the EO-EPI regressor. To create FEF and SEF regions of interest, we used the NeuroSynth  
223 database (Yarkoni, Poldrack, Nichols, Van Essen, & Wager, 2011). The probability mask corresponding to the keyword *eye* was  
224 saved and thresholded by z-score of 7 (max  $Z=9.1$ , generated from 417 studies). From the thresholded image, regions around  
225 the intersection of precentral sulcus and superior frontal sulcus were marked as FEF, and region around medial frontal gyrus  
226 was marked as SEF (see Appx.4). Those masks were spatially translated to the individual-subject space and mean activation of  
227 those two ROIs extracted from the cleaned and smoothed data. We constructed a regression model to predict that FEF and SEF  
228 regional activity from the EO-EPI series per participant. Coefficients were analyzed using a Wilcoxon rank sum test.

### 229 **Functional connectivity maps and derived network metrics**

230 To create functional connectivity networks, we used Schaefer et al. (2018)’s resting-state functional connectivity parcellation  
231 based on 500 regions of interest (ROIs). We spatially translated this parcellation into each participant’s individual space,  
232 where they were further limited to gray matter by multiplying all ROIs with the participant-specific gray matter mask (to limit  
233 the influence of data from non-gray matter areas). We extracted the mean time series from each ROI, for the two types of  
234 spatially-smoothed resting-state data we derived (one typical, and the other with EO-EPI regressed). We examined the network  
235 features after thresholding the connectivity matrices at three sparsity levels – 10%, 20%, 30%. While the thresholding removed  
236 weak connections, we did not binarize the remaining (above-threshold) connections but analyzed the complete set of data.  
237 From each participant’s resting state network we derived the following metrics: node degree, strength, cluster coefficient,  
238 transitivity, assortativity, efficiency, number of communities, betweenness centrality and modularity. We calculated these using  
239 the Brain Connectivity Toolbox (Rubinov & Sporns, 2010) (See Appendix for description of the metrics as described in the

240 Brain Connectivity Toolbox). We calculated these parameters for the original and “clean” networks as defined above. We then  
241 tested which of these parameters differed as a result of the EO-EPI-removal procedure using paired-sample T-tests. We defined  
242 a robust result as one that was statistically significant across all three levels of sparsity thresholding (full results are reported for  
243 completeness).

244 We also probed changes in global topology by quantifying the impact of EO-EPI removal on the shape of the entire degree  
245 distribution (within each sparsity level). Following prior work (e.g., Fornito, Zalesky, & Bullmore, 2010) we fit a truncated  
246 power law function to each participant’s degree distribution. The function was  $Y = a \times X^b \times e^{(x \times c)}$ , Where  $Y$  is the cumulative  
247 probability of the distribution and  $x$  = node degree. From this equation, we derived the coefficient ( $a$ ), power law exponent  
248 ( $b$ ), and degree cut-off point ( $c$ ). A paired-sample t-test was applied for each parameter to see if the parameters differ across  
249 conditions.

250 Using previously defined criteria (Xu et al., 2014), we detected hubs for the networks defined by the three sparsity  
251 thresholds. These criteria required that the value of a node be higher than 1 SD above the mean value for each of these  
252 empirical distributions: node strength, node degree and node between-ness centrality. Nodes matching all three criteria were  
253 considered hubs. The chance probability of a node being a hub (assuming a normal distribution) is  $\sim 0.34^3 = .04$ . To evaluate  
254 whether removal of EO-EPI variance impacted whether a region satisfied hub criteria, for each region we counted the number  
255 of participants for which the region was classified as a hub, with or without EO-EPI removal. On a binomial, a difference  
256 would need to consist of at least 7 or more participants (binomial test parameters:  $N = 86; K = 7; p = .04$ ).

257 We also identified any specific pair-wise differences in regional connectivity for the raw and cleaned matrices. After  
258 applying Fisher’s Z transformation, pair-wise correlation values were subjected to paired-sample t-tests. We used false discovery  
259 rate (FDR) to correct for multiple comparisons.

## 260 **Dual Regression**

261 We used dual regression to determine how removal of activity associated with the EO-EPI regressor impacted connectivity in  
262 well-defined resting-state networks. The procedure was implemented in AFNI and followed workflows described previously  
263 (Beckmann, Mackay, Filippini, & Smith, 2009; Nickerson, Smith, Öngür, & Beckmann, 2017). In the first step we used 14  
264 pre-defined resting-state network spatial masks (Shirer, Ryali, Rykhlevskaia, Menon, & Greicius, 2012) to extract ‘seed’ time  
265 series for each of the networks. The 14 resting-state network masks were spatially transposed to individual space and multiplied  
266 with gray matter of the participant to reduce contribution from non-gray-matter areas. For each participant we then produced  
267 two seed time-series for each of the 14 networks: one from the functional data from which the EO-EPI variance was not  
268 removed, and one from the functional data from which this variance was removed using the  $EYE_{conv}$  regressor.

269 To determine whole brain connectivity of the seed regions we inserted all 14 time series into a single multiple regression.  
270 In effect, we conducted two separate regression models: Model #1 was a “typical” model where the mask-derived seed time  
271 series produced from the original (typically-processed) functional data served as regressors to predict whole-brain resting state  
272 data. This process replicates the procedure typically used in resting-state dual regression. Model #2 was an “EO-EPI-removed”  
273 model where masked-derived seed time series produced from EO-EPI-removed functional data were used as regressors to  
274 predict the EO-EPI-removed functional data. This is a dual regression that uses EO-EPI-cleaned resting state data.

275 The produced beta weights were analyzed using group level repeated-measures test to identify seed-time-series whose  
276 connectivity differed between the two data sets; i.e., whose connectivity was impacted by the EO-EPI-removal procedure. We  
277 used FSL’s *randomise* function (Jenkinson et al., 2012). A within group T-test with 10000 permutations and threshold-free  
278 cluster enhancement was applied. Because our interest was in evaluating the impact EO-EPI-regressor we adopted a liberal  
279 approach of not correcting for multiple comparisons across the 14 networks tested in the dual regression procedure. We also  
280 note that the 14 time series used for dual regression were relatively weakly correlated in this data set: to determine collinearity,  
281 on the single participant level we computed the  $14 \times 14$  cross-correlation matrix and then averaged these across participants.  
282 The highest mean correlation was 0.55, which licensed separate analyses for each network regressor.

## 283 **Results**

### 284 **Eye tracking data: Quality and correlation with whole-brain BOLD**

285 Based on our artifact rejection criteria, usable eye-tracking data were available for 32 of 77 participants for which eye tracking  
286 data were collected. A power-spectra analysis of the eye tracking data (Figure Appx.1) indicated higher broad-band power in  
287 all frequencies in the rejected data, including those approaching the Nyquist frequency of the eye-tracking data in the current  
288 study ( $f = 30Hz$ ). Participants largely avoided making large eye movements during the resting-state session. To quantify  
289 these movements, we calculated the maximal displacement of gaze position in non-overlapping 2sec windows. The resulting  
290 empirical cumulative distribution functions (see Figure 1A) indicated modest movement, with around 50% of analysis windows  
291 showing displacement values  $< 1^\circ$  and only around 10% of windows showing displacement values  $> 3^\circ$ .

292 Whole brain correlations with eye-tracking metrics were found for the *blinkfunction* and *GazeX<sup>2</sup>* regressors and presented

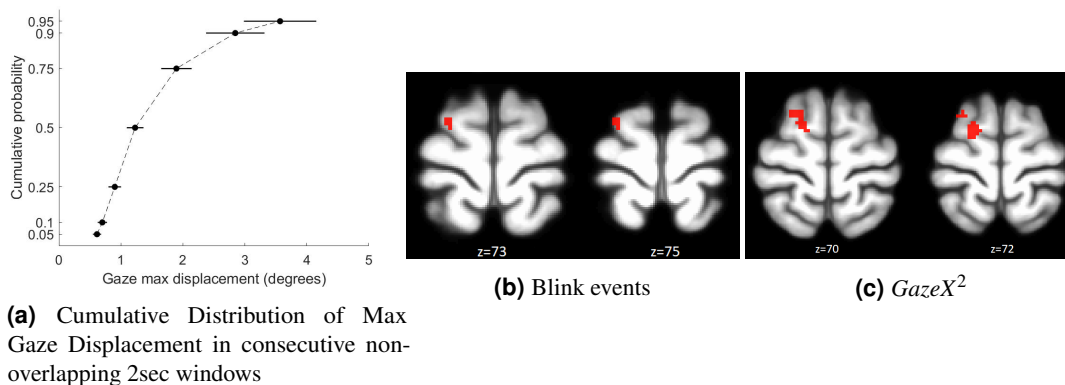

**Figure 1.** Relation between eye-tracking measures and EO-EPI regressor from eye orbits. Panel A: modest eye movements in 2-sec non-overlapping time windows. Panels B, C: whole brain correlates of resting-state BOLD with blink events and  $GazeX^2$ . Each analysis is corrected for multiple comparisons using FSL's implementation of TFCE Family-wise-error control.

293 in Figure 1B, C ( $p < .05$ , corrected for multiple comparisons with FWE; see Supplementary Table 1 for coordinates). We note  
 294 these findings were identified via a Finite Impulse Response (FIR) analysis (see *Methods*) which estimated the HRF shape per  
 295 regressor. Regressions based on canonical HRF-convolved regressors produced results that were not statistically significant.

### 296 Eye tracking data: Correlation with Eye Orbit EPI data

297 We evaluated the correlation between each of the 12 types of eye tracking time series (see *Methods*) and the EO-EPI data. We  
 298 controlled for the 12 tests using Bonferroni correction, because some of the tests were highly correlated (see Figure Appx.2).  
 299 We found that three eye-tracking regressors significantly correlated with the EO-EPI envelope (Bonferroni corrected for 12  
 300 tests): the gaze power  $vel\_GazeX^2 + vel\_GazeY^2$ , square of pupil size  $PupilSize^2$ , and the gaze velocity in the vertical ( $Y$ )  
 301 direction. The pupil size was evaluated as deviation from the subject's mean value, so its squared value indicated absolute  
 302 deviations from mean value (we used squared deviation rather than absolute value as the derivative of the exponent is better  
 303 behaved than that of the absolute function). Figure 2A shows sample time series reflecting raw EO-EPI, its envelope and  
 304 eye-tracking regressors, and Figure 2B shows the estimated Kernels for gaze power and square of pupil size.

305 Pupil-size squared explained  $7 \pm 2\%$  of the variance of the EO-EPI envelope and presented a significant positive correlation:  
 306  $\rho = 0.17 \pm 0.05$ ,  $t(30) = 3.45$ ,  $p = .0017$ ,  $d = 0.62$ . Gaze power explained  $5.4 \pm 1.6\%$  of the variance of the EO-EPI envelope  
 307 and had a significant negative correlation:  $\rho = -0.17 \pm 0.03$ ,  $t(30) = 5.18$ ,  $p < .001$ ,  $d = 0.93$ . These two variables jointly  
 308 explained the  $11 \pm 3\%$  of EO-EPI envelope' variance, a significant improvement in model performance with respect the single  
 309 variable cases ( $\Delta BIC < -2$ ). Gaze velocity in the  $Y$  direction had a weaker impact; it explained  $3.7 \pm 1.0\%$  of the EO-EPI's  
 310 envelope variance and had a significant positive correlation:  $\rho = 0.11 \pm 0.03$ ,  $t(30) = 3.67$ ,  $p < .001$ ,  $d = 0.66$ . Adding this  
 311 variable to the preceding regression model did not significantly increase explained variance ( $\Delta BIC = -0.5$ ). The exact numeric  
 312 values corresponding to these kernels is given in Supplementary Table 2. Blinks were not significantly correlated with EO-EPI.

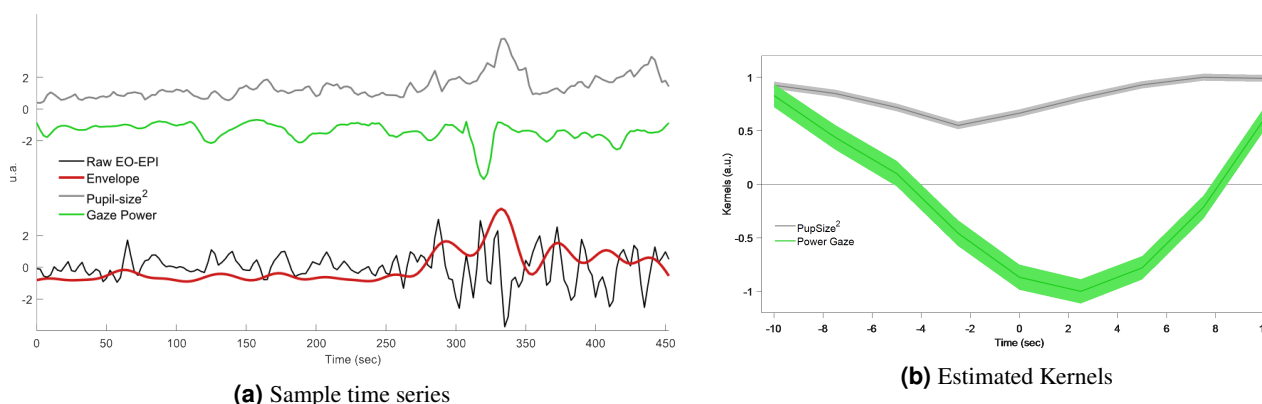

**Figure 2.** Relation between eye-tracking measures and EPI Orbit (EO-EPI) regressor.

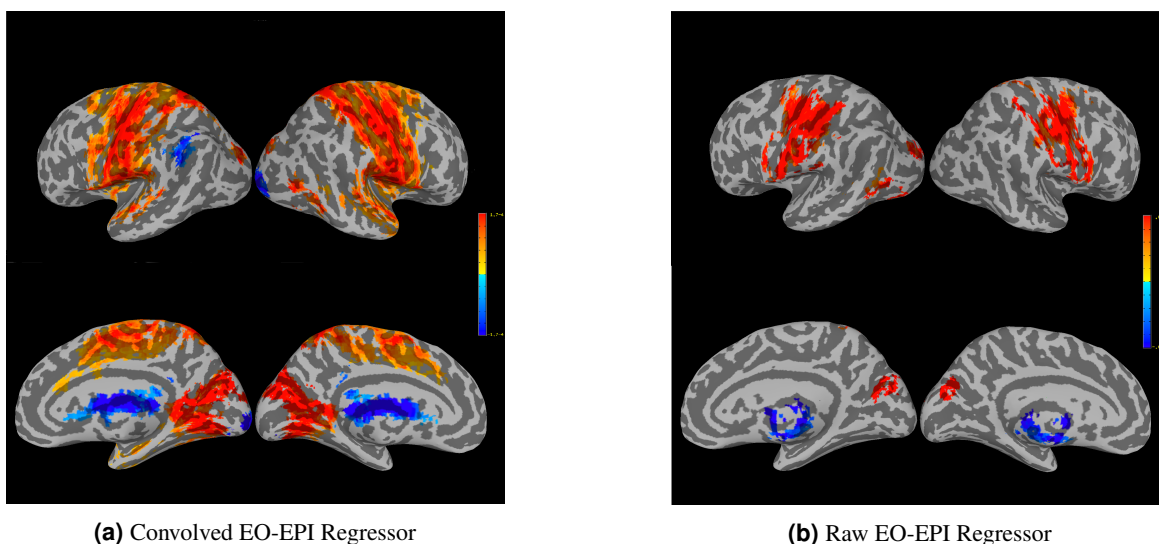

**Figure 3.** Whole-brain connectivity maps for the  $EYE_{conv}$  (Panel A) and  $EYE_{raw}$  regressors (Panel B).

### 313 Connectivity of EO-EPI regressors

314 We identified an extensive system that correlated with the EO-EPI regressor. For the convolved version of the EO-EPI regressor  
315 ( $EYE_{conv}$ ) we found correlations in pre- and post-central gyri bilaterally, parts of the superior temporal gyrus and visual cortex  
316 (Figure 3A). We also identified strong correlations (of opposite sign) in the thalamus (Figure 4A). We also found whole brain  
317 correlations for the non-convolved versions of the EO-EPI regressor ( $EYE_{raw}$ ). These were qualitatively similar, but reduced  
318 in extent (see Figures 3B, 4B). Whole-brain clusters for the  $EYE_{raw}$  and  $EYE_{conv}$  regressors are included in Supplementary  
319 Tables 3 and 4. A region of interest analysis indicated statistically significant correlations with EO-EPI in FEF (Wilcoxon  
320  $z = 6.15, p < .001$ ) but not in SEF ( $z = -1.28, p > .05$ ).

321 In general, the tSNR of the raw time series was quite good across the cortex (see Figure Appx.5), with typical dropoff in  
322 low-signal and areas susceptible to motion. Values were similar to the those reported by the Human Connectome Project for  
323 2mm and 3mm non-cleaned data (Smith et al., 2013). We treated each cluster where BOLD activity correlated with EO-EPI  
324 (raw or convolved) as a functional ROI and calculated the Mean and SD of tSNR in each cluster across participants. Most  
325 of these areas were associated with adequate tSNR, including the thalamus. This held for all statistically significant clusters  
326 picked up by the  $EYE_{raw}$  regressor (see Supplementary Table 5). For  $EYE_{conv}$  the clusters found in the left and right cerebellum  
327 were associated with low tSNR (and relatively systematically across participants, see Supplementary Table 6), as was a cluster  
328 in the mid occipital gyrus bilaterally (potentially as it includes time series from the field of view between the two hemisphere).

### 329 EO-EPI regressor: between-participant differences in variance, power-spectra properties and relation to 330 motion parameters

331 Across participants, the time series of the EO-EPI regressor presented a larger range of standard-deviation values than found in  
332 other ROIs. Figure 5A presents a histogram of the SD values for  $EYE_{raw}$  in the participant group, and comparative values from  
333 the temporoparietal junction (TPJ). The SD values for TPJ were relatively low and tightly clustered in the range of 5-45, with a  
334 mode of 10. In contrast, for the EO-EPI regressor, there was much less systematicity in the spread values across participants:  
335 the distribution of SD values was relatively more uniform and showed much larger values, some with  $SD > 200$ . The mean  
336 number of voxels in these regions was 1270 for TPJ and 406 for  $EYE_{raw}$ .

337 The reason for these differences across participants is unclear. However, a byproduct is that when the EO-EPI regressor  
338 is correlated with brain activity in the context of regression, the resulting Beta values for this regressor have a very broad  
339 distribution with significant differences across participants and outliers. For this reason, using a parametric test on the group  
340 level can produce false-negatives or positives. To illustrate: in this current study, when non-parametric tests are used for  
341 group-level analysis, then both the Sign test and the Wilcoxon test produce group-level significance maps as reported here.  
342 AFNI's multilevel analysis 3DMEMA (G. Chen, Saad, Nath, Beauchamp, & Cox, 2012), which down-weights beta values from  
343 participants with noisier Beta estimates produces similar results, though statistically weaker. However, a typical group-level  
344 T-test of Beta values against zero produced a null result.

345 The large standard deviation of the EO-EPI regressor was related to peaks in that signal. As indicated in the *Methods*  
346 section, applying a 'despiking' procedure reduced the sensitivity of the whole brain correlation analysis: its most extreme



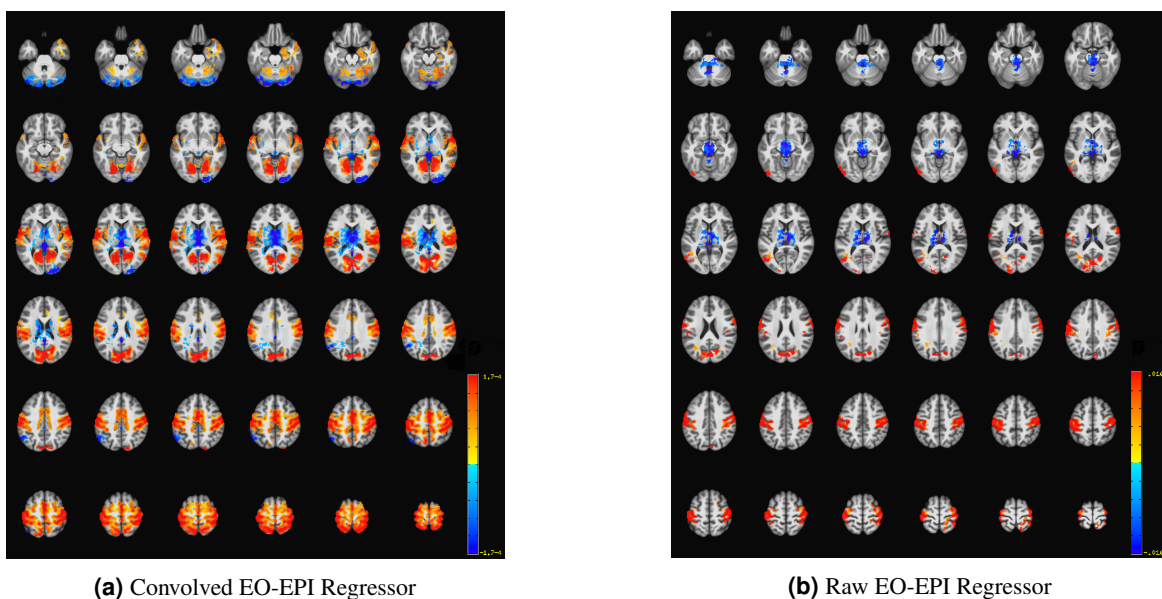

**Figure 4.** Axial slices showing whole-brain connectivity for the  $EYE_{conv}$  (Panel A) and  $EYE_{raw}$  regressors (Panel B).

347 effect was flattening several time series from the eye-orbit area, and in other cases it impacted a large number of time points  
348 in that area (see Figure Appx.3 for example). An analyses of the spectral features of EO-EPI (Figure 5B showed a strong  
349 peak in those time series at  $0.04Hz$ , i.e., a cycle of 25sec. This is consistent with slow fluctuations sometimes seen in cortical  
350 regions. To summarize, the EO-EPI regressor, as would be expected, presented some time-domain features (spikes and strong  
351 inter-individual differences in spread) that differ from BOLD time series acquired in the brain and these need to be considered  
352 during pre-processing and group-level analyses. That said, its spectral power presented a strong peak at low frequencies of the  
353 sort seen in cortical BOLD time series.

354 With rare exceptions,  $EYE_{raw}$  was not-correlated with the estimated head-motion parameters. Significant correlations  
355 with any of the 6 motion parameters were found for 3 of the 83 participants: In the first case there was correlation with  
356 L/R displacement; in the second case there was correlation with L/R displacement and rotation; in the third case 5 of the 6  
357 parameters were correlated. In all cases, correlation values were below 0.2. This lack of correlation suggests that variance in  
358  $EYE_{raw}$  signal is not related to head motion, though an extreme case of movement may be picked up in this signal as well.

### 359 Functional connectivity networks

360 An analysis of the network metrics revealed that several were significantly impacted by EO-EPI-removal, across all three  
361 Sparsity thresholds (i.e., top 10, 20 and 30% of connections). Difference values, effect sizes, and results of statistical tests  
362 are reported in Table 1. As shown in the Table, statistically significant results were associated with medium effect sizes in  
363 the range of 0.4-0.5. The raw connectivity matrices presented higher values for Maximal and Mean Node strength, Mean  
364 Cluster Coefficient (and transitivity). Conversely, maximized modularity was greater for the clean (EO-EPI-removed) matrices.  
365 Supplementary Table 7 reports the raw values for each metric.

366 Fitting the degree distributions using an exponentially truncated power law showed that the EO-EPI removed networks  
367 differed in the degree distribution (see Figure 6). As shown in the Figure, for 10% sparsity networks, EO-EPI removal impacted  
368 all three coefficients of the truncated power-law fit: coefficient:  $t(82) = 3.33, p < .01, d = 0.37$ , power law exponent,  $t(82) =$   
369  $-3.70, p < .001, d = 0.41$ , and degree cutoff point,  $t(82) = 3.59, p < .001, d = 0.4$ . For the 20% sparsity networks, differences  
370 were found for power law exponent,  $t(82) = -3.13, p < .01, d = 0.37$ , and degree cutoff point,  $t(82) = 2.59, p < .01, d = 0.33$ .  
371 No statistically significant differences were found for 30% sparsity networks. Figure Appx.6 presents mean degree-distributions  
372 for Raw and Clean networks in the different sparsity levels.

373 We determined which areas tended to show changes in connectivity as function of EO-EPI removal. In general, this analysis  
374 is not independent of the whole-brain correlation with the EO-EPI time series used as a regressor, but it is more sensitive  
375 in identifying strongest pairwise differences. For each of the around 124,000 pairwise correlations we conducted a T-test to  
376 determine whether the pairwise correlations differed for raw and EO-EPI-removed connectivity matrices. The results (FDR  
377 corrected; Figure 7) showed that connectivity matrices constructed from the raw matrices presented stronger connectivity  
378 of sensory-motor areas with temporoparietal, dorsal-attention, visual cortex, and other sensory-motor regions. There were

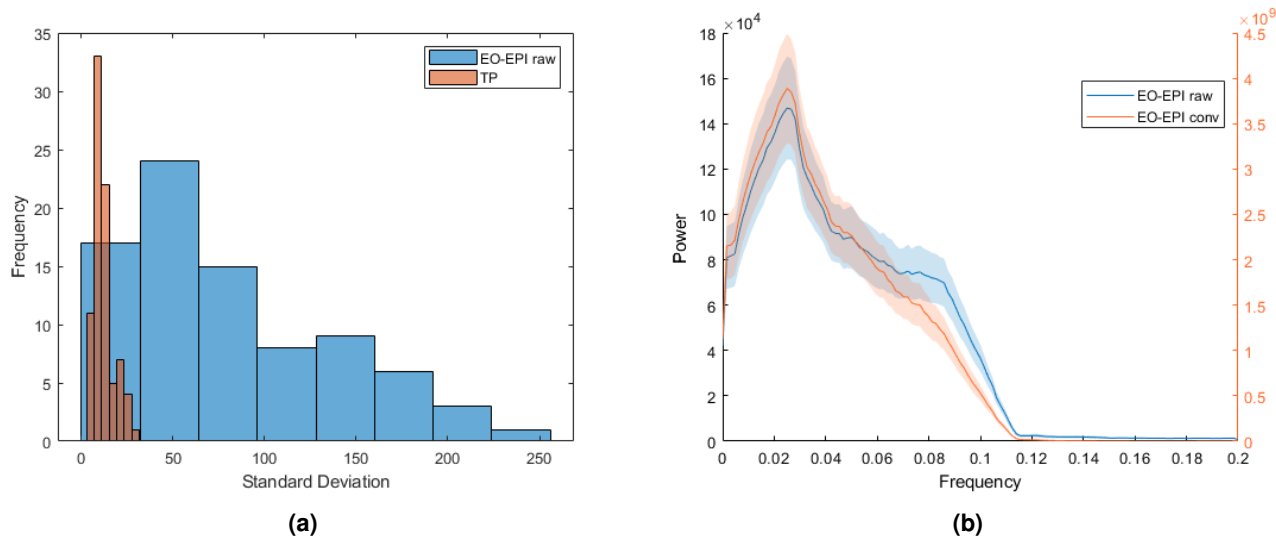

**Figure 5.** Spectral and spread-properties of EO-EPI regressor. Panel A: Across-participant distribution of standard deviations of EO-EPI time series and (for contrast) average time series from temporoparietal-junction ROI. Panel B: Frequency distribution of convolved and raw EO-EPI series. Differences in order of magnitude are due to convolution with HRF basis function.

|                             | Sparsity=0.1 |           |          | Sparsity=0.2 |      |         | Sparsity=0.3 |      |         |
|-----------------------------|--------------|-----------|----------|--------------|------|---------|--------------|------|---------|
|                             | Difference   | Cohen's D | T stat   | Dif.         | D    | T       | Dif          | D    | T       |
| Max Degree                  | 1.23         | 0.38      | 3.40**   | 0.74         | 0.37 | 3.33**  | -0.04        | 0.02 | -0.22   |
| Min Degree                  | 3.45         | 0.04      | 0.38     | -2.58        | 0.08 | -0.76   | -1.90        | 0.10 | -0.92   |
| Max Strength                | 2.45         | 0.49      | 4.41***  | 2.11         | 0.46 | 4.13*** | 1.91         | 0.42 | 3.79*** |
| Min Strength                | 8.03         | 0.10      | 0.86     | -4.59        | 0.16 | -1.47   | -2.51        | 0.14 | -1.26   |
| Mean Strength               | 0.99         | 0.49      | 4.36***  | 1.22         | 0.46 | 4.14*** | 1.38         | 0.44 | 3.94*** |
| Max Cluster Coefficient     | 0.50         | 0.12      | 1.06     | 1.21         | 0.26 | 2.32*   | 1.87         | 0.32 | 2.90**  |
| Min Cluster Coefficient     | 6.05         | 0.02      | 0.14     | -3.52        | 0.08 | -0.70   | -1.43        | 0.07 | -0.61   |
| Mean Cluster Coefficient    | 1.08         | 0.46      | 4.11***  | 1.65         | 0.47 | 4.22*** | 1.84         | 0.44 | 3.94*** |
| Transitivity                | 1.92         | 0.46      | 4.11***  | 2.39         | 0.46 | 4.14*** | 2.49         | 0.45 | 3.99*** |
| Assortativity               | 0.31         | 0.06      | 0.54     | 1.44         | 0.22 | 1.95    | 2.12         | 0.28 | 2.46*   |
| Efficiency                  | 0.12         | 0.18      | 1.60     | 0.58         | 0.49 | 4.39*** | 0.80         | 0.46 | 4.07*** |
| Max Number of Community     | 0.02         | 0.01      | 0.10     | -0.02        | 0.05 | -0.42   | -0.02        | 0.05 | -0.44   |
| Maximized modularity        | -0.007       | 0.44      | -3.95*** | -0.005       | 0.38 | -3.36** | -0.003       | 0.34 | -3.03** |
| Max betweenness centrality  | -0.21        | 0.02      | -0.16    | 0.12         | 0.01 | 0.10    | 0.65         | 0.07 | 0.63    |
| Mean betweenness centrality | 0.86         | 0.41      | 3.70***  | 0.76         | 0.39 | 3.50*** | 0.25         | 0.14 | 1.29    |

**Table 1.** Difference of network metrics between Raw and Clean (EO-EPI-removed) functional connectivity matrices. Differences shown are in units of percentage apart from the number of communities and maximized modularity which maintain the original measure. \*= $p < .05$ , \*\*= $p < .005$ , \*\*\*= $p < .001$

379 relatively few regions that showed stronger connectivity in the EO-EPI-removed condition, notably the Posterior Cingulate  
380 which showed stronger connectivity with multiple other brain areas.

381 The dual regression analysis did not identify any pre-defined RS network for which connectivity changed significantly.  
382 A hub-focused analysis that examined whether there were regions more frequently identified as hubs in the raw or EO-EPI-  
383 removed series also produced a null result: the most extreme example was a region defined as hub for 20 participants in one case  
384 and 25 in another (a non-significant difference on a binomial). While the location of these hubs was not a central point of the  
385 current study, broadly speaking, for the 10% sparsity threshold (raw) matrices, hubs were localized motor and sensory-motor  
386 areas (9 regions) Dorsal attention (6 regions), DMN (4 regions), temporal-parietal areas (4 regions) and ventral attention (2  
387 areas). Only one visual extrastriate area was identified as a hub.

## 388 Discussion

389 Neuroimaging is continuously expanding our understanding of the principles that determine structured patterns of RS connec-  
390 tivity. Our findings demonstrate that endogenous eye movements during RS contribute significantly to structured patterns of RS  
391 connectivity. Our main finding is that eye movements, measured via EPI time series recorded from the eye orbits, identified a  
392 sensory-motor system that appeared linked to oculomotor activity. Removal of activity accounted for by eye movements had  
393 systematic impact on whole-brain connectivity. We first address issues related to oculomotor measurement during the resting  
394 state that emerged in the study and then discuss the implications of the results for basic and applied research.

### 395 Probing resting-state networks with Eye tracking and eye-orbit EPI data: technical considerations

396 As reviewed in the Introduction, few studies have studied brain activity patterns that are correlated with oculomotor activity  
397 during the resting state, and those have produced inconsistent and sometimes puzzling results. The most relevant is Fransson  
398 et al. (2014, N=18): It derived gaze-velocity data from eye tracking during a resting-state scan, finding correlation with DMN  
399 activity. Also related is McAvoy et al. (2012, N=9) which examined Brain/EOG correlations and reported a null result. In  
400 our own analyses of eye tracking data (N=32), we found correlation between BOLD-RS and only two eye tracking metrics:  
401 horizontal eye displacement, and blinks. These relatively modest correlations could be the result of noise in the eye tracking  
402 data, which presented itself in higher power across all frequencies for rejected data as compared to analyzed data.

403 We found correlations between the eye-tracking metrics and EPI data recorded from the eye orbit area (EO-EPI), Bonferroni  
404 corrected for 12 correlation tests. These were found for Gaze power, pupil size (squared), and gaze velocity in the Y direction.  
405 These data are consistent several prior reports. Beauchamp (2003) showed that peaks in the EO-EPI time series occur when an  
406 MR acquisition coincides with a rapid saccadic eye movement. Brodoehl, Witte, and Klingner (2016) and Son et al. (2019)  
407 showed that EO-EPI data can be used to estimate gaze location (when non-averaged; i.e., used in a multivariate context). In  
408 addition, Beauchamp's observations suggest that for our interleaved acquisition, eye movements occurring either during odd-  
409 (up direction) or even-numbered (down direction) slice acquisition could be picked up in the analysis, because we treated the  
410 entire eye orbit as a single ROI. Consequently, while the volume acquisition time was 2.5sec, our effective temporal resolution  
411 for the eye-orbit ROI could have been higher, as we could identify eye-movement during both the up- or down- acquisition  
412 direction. EO-EPI fluctuations are likely mainly driven by signal disturbances due to air/tissue motion, but we cannot exclude  
413 the possibility that the signal also contains a BOLD component, due to the metabolic activity in nearby muscles. In particular,  
414 Law (1998) used PET rCBF to study brain systems involved in generation of voluntary saccades and reported active areas in  
415 the eye-orbit, "primary located close to the apex of the pyramidal shaped orbital cavity". Our finding of a systematic delayed

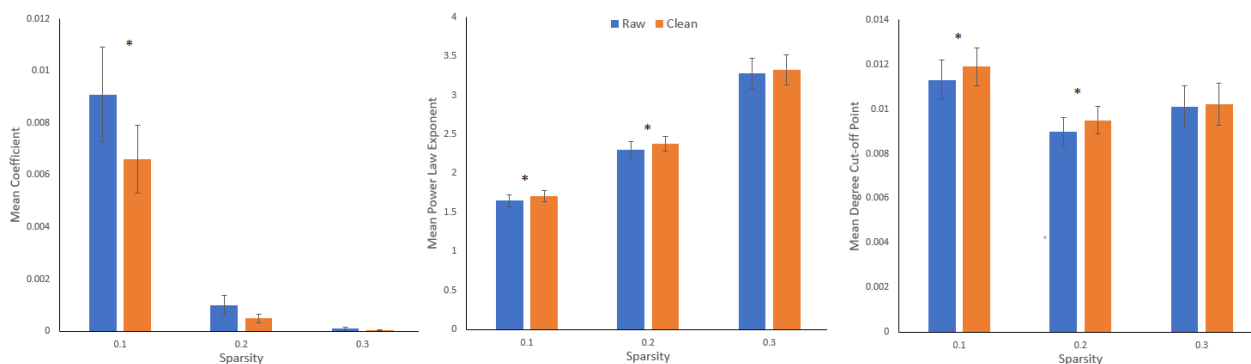

**Figure 6.** Mean power law parameters across sparsity levels (Coefficient, Power law exponent, Power law cutoff point). Bar-pairs for which a difference was significant are marked with a star (\*).

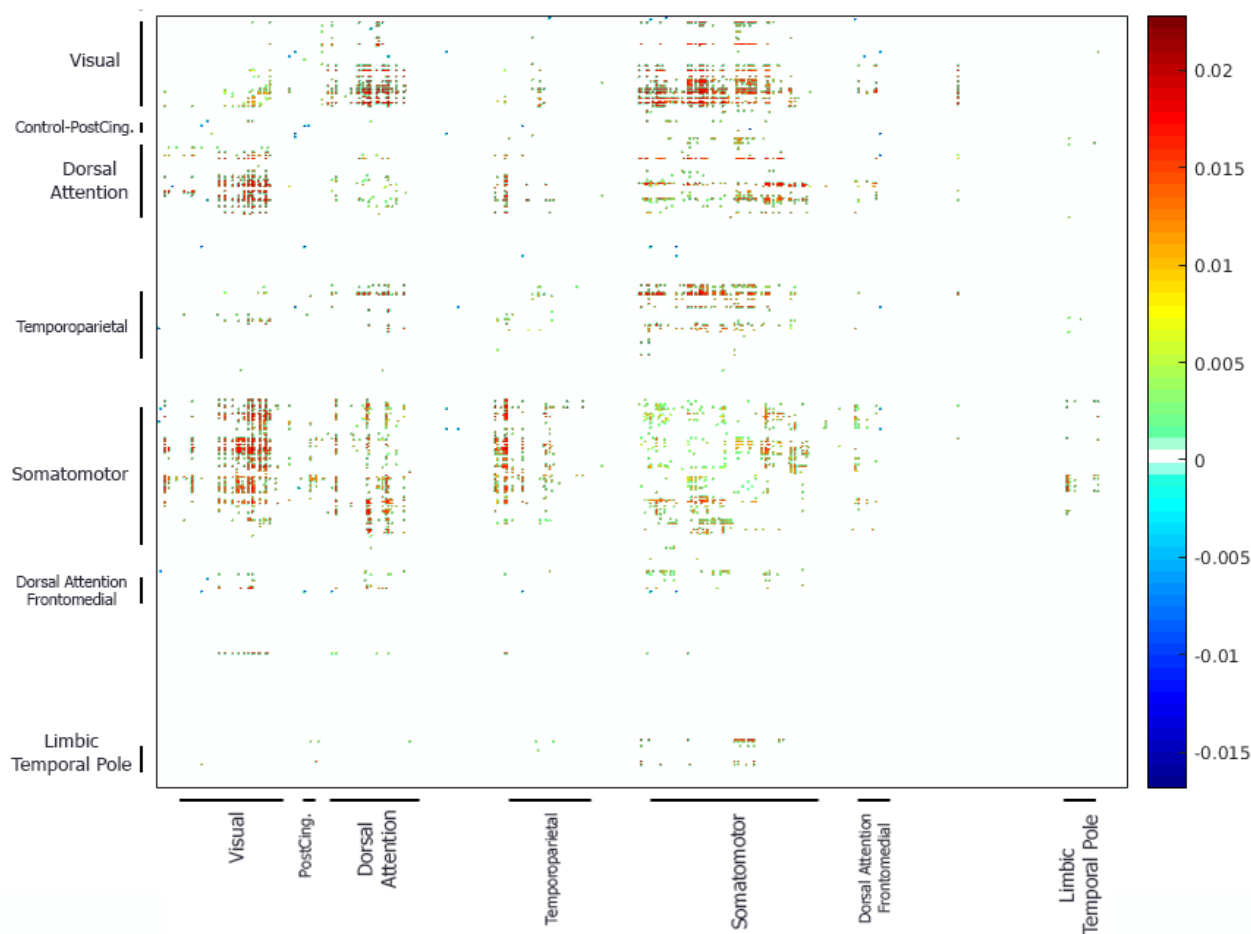

**Figure 7.** Pairwise-connectivity differences between raw and clean functional connectivity matrices ( $Raw - clean, p < 0.05$ , corrected for multiple comparisons with FDR).

416 coupling in which changes in pupil size preceded EO-EPI fluctuations (the latter delayed by 2 sec), and of a strong peak  
 417 frequency of 0.04Hz for EO-EPI are both consistent with the possibility that EO-EPI also reflects metabolic activity. We also  
 418 found little independent evidence to suggest a strong contribution of motion artifacts to EO-EPI: beyond one participant for  
 419 which 5 of 6 motion parameters correlated with EO-EPI, we only found 2 additional correlations with motion elements, for two  
 420 additional participants.

421 Note that task compliance during this RS study was good. First, participants were continuously monitored and experimenters  
 422 verified participants did not drift off to sleep during the scan. Second, the eye-tracking data indicated compliance with the  
 423 task instructions in that the eye movements that were made during fixation were minor in magnitude (see Figure 1A). When  
 424 evaluating average movements between successive 2sec epochs we found that in 75% of the cases, the magnitude was below  
 425 2degree, which corresponds to a small displacement. For this reason, we consider these data to be representative of typical  
 426 compliant behavior during wakeful rest.

#### 427 **Brain systems identified by Eye-Orbit EPI (EO-EPI) regressor**

428 When used as a whole-brain regressor, the EO-EPI time series correlated with an extensive bilateral sensory-motor system. In  
 429 addition, activity was found in superior parietal lobule, the dorsal part of the superior frontal gyrus, supplementary motor areas,  
 430 and the extrastriate cortex in occipital lobe (excluding striate cortex). Region-of-interest analyses indicated activity in frontal  
 431 eye fields. The topography of this system does not match either the ventral or dorsal attention networks as usually defined, but it  
 432 is quite similar to the Frontal-Eye-Field connectivity map reported by Fox, Corbetta, Snyder, Vincent, and Raichle (2006). It is

also highly similar to activity maps reported for simple eye movements in absence of attention, which have identified extensive activity in motor and premotor areas (e.g., Balslev et al., 2011) with little front-parietal involvement. A subset of these regions was also picked up by a non-convolved ('Raw') version of the EO-EPI regressor which may indicate that activity in these areas does not precede eye movements, but is relatively contemporaneous with them (to the extent that can be inferred from fMRI), or even that the eye movements reflected in the EO-EPI time series follow activity in those areas.

The brain areas we identify using EO-EPI (or eye tracking regressors) depart from ones frequently mentioned in studies of saccadic mechanisms, which prototypically reveal involvement of FEF/SEF and IPS. There are several possible explanations for this, which are not mutually exclusive. First, neuroimaging studies of saccades study saccade execution under exogenously determined conditions. Specifically, a distinction is made between two saccade categories, both externally-controlled: 'reflexive' saccades that orient to peripheral (typically sudden) target appearance, and 'voluntary' saccades that are not oriented towards a target in an unmediated manner but rather require a cognitive judgment prior to eye movement (for review, see Mort et al., 2003). These voluntary saccades are studied by paradigms such as anti-saccades (saccading to the opposite screen side of a target), memory-guided saccades (saccading to a location maintained in memory), or saccading to a location pre-cued by an arrow. Note that both reflexive and voluntary saccades are associated with few degrees of freedom with respect to the actual saccade-target, which constitutes a fundamental difference from the resting-state case. In addition, as indicated by Brown et al' study (reviewed in the Introduction), activity in FEF/SEF/IPS may not be related to endogenous oculomotor control per se, but to the paradigm demands that require attention and detection of visual cues. In support of this possibility, a recent study (Agtzidis, Meyhöfer, Dorr, & Lencer, 2020) examining eye movements during naturalistic movie viewing similarly failed to identify a frontal parietal system related to saccades (neither dorsal nor ventral attention systems; see their Table 2), but instead documented saccade-related activity in visual cortex, and smooth-pursuit activity in precuneus, cingulate and occipital cortices. The authors attribute this failure to differences in paradigm, suggesting that natural viewing is associated with constant engagement rather than phasic shifts between fixation and saccades. This is also corroborated by the report by Son et al. (2019, N=5) showing that during naturalistic viewing, data acquired from the eye orbits correlates with brain activity in areas that do not resemble the topography of attentional networks (see their Figure 5).

Another possibility, which does not assume substantial differences between RS and active tasks, is technical in nature: it is possible that endogenous oculomotor-linked sensory motor activity during resting state is simply not often reported just because fixation is a frequently used implicit baseline in many oculomotor studies. If the network we identify is correlated with oculomotor activity both during fixation and saccade-to-target epochs (either reflexive or voluntary), then it will not be identifiable in analyses against baseline because it is partialled out as a result of that contrast.

### 462 **The impact of removal of EO-EPI properties from BOLD activity**

463 We examined the impact of removing the variance related to EO-EPI from brain activity using a few well-defined topographical  
464 and topological properties. For topography we found that removal did not have a statistically significant impact on connectivity  
465 in any of the 14 well-defined resting state networks. We also examined the impact of removal on pair-wise regional connectivity  
466 using a 500-ROI parcellation (Schaefer et al., 2018). We grouped these 500 regions into 7 main clusters for purposes of  
467 graphical presentation (Figure 7). The analysis produced statistically significant effects (FDR corrected), mainly showing that  
468 EO-EPI-removal was associated with reduced connectivity between the somatomotor regions and visual, temporoparietal and  
469 also few dorsal-attention network areas. Also as shown in Figure 7, connectivity within each system was weakly impacted  
470 by EO-EPI removal if at all (i.e., few changes along the diagonal), which is consistent with the dual-regression results. To  
471 conclude, EO-EPI-removal appeared to primarily impact cross-network connectivity rather than within-network connectivity.  
472 Finally, we did not find evidence that EO-EPI-removal impacted the distribution of network-hubs in the brain.

473 However, robust results were found for both global and local topological metrics identified by a network analysis. We report  
474 only results that maintained across three sparsity thresholds: 10%, 20% and 30% of connections. For global properties, we find  
475 that modularity (Q) was higher for the clean matrices. For local properties, we found that the raw matrices were associated with  
476 greater node-strength values (indicating sum of connectivity linked to each node). For max-strength, the difference was 2.45%  
477 (effect size= 0.49). The mean cluster-coefficient (and strongly related, transitivity) were also impacted, showing reduced values  
478 (approaching 2.5% difference; effect-size=0.49) for the cleaned time series.

479 These changes are consistent with our other findings. EO-EPI is correlated with occipital, sensory-motor and few fronto-  
480 parietal areas, and as shown, EO-EPI removal predominantly impacts inter-regional / inter-internetwork connections rather than  
481 intra-network connections. For this reason, its removal serves to increase the modularity of resting state networks.

### 482 **Implications for network studies of typical and special populations**

483 As indicated in a recent review (Hallquist & Hillary, 2018), graph theoretical approaches are increasingly applied in the context  
484 of resting-state fMRI studies of clinical disorders. In some cases, these features are deployed clinically to define new clinical  
485 subtypes, and in other cases, they are used to advance understanding of the brain systems that may be associated with the  
486 clinical deficit.

487 Being able to link differences in graph-theoretic-metrics to the oculomotor systems can increase the specificity of the  
488 explanations provided by RS analyses (by linking differences to a specific behavior), and would allow determining to what  
489 extent differences in RS connectivity between populations can be attributed to differences in oculomotor activity during  
490 resting-state acquisition.

491 A number of examples present the logic of this approach. For example, Parkinson's Disease (PD) is associated with changes  
492 to functional connectivity when analyzed both from dynamic and static perspective (Kim et al., 2017). Neurophysiologically, it  
493 is associated with abnormality in eye movement control, including in generation of voluntary saccades. Anomalies are more  
494 evident for voluntary saccades, in early stages of disease (for review, see Pretegianni & Optican, 2017). A behavioral study  
495 (Zhang et al., 2018) showed that PD is linked to reduced fixation stability when fixation is required. Conversely, during free  
496 viewing of single images, PD patients make fewer saccadic eye movements, and within a more narrow range. Differences in  
497 network modularity for clinical populations have been documented in the case of Autism, which present lower modularity  
498 (Rudie et al., 2013) and Traumatic Brain Injury (Han et al., 2014) which has been associated with higher modularity and lower  
499 participation coefficient of sensory-motor systems (i.e., these areas are more weakly involved in between-module connectivity).  
500 In addition, both schizophrenia (e.g., Alexander-Bloch et al., 2012) and depression (e.g. Drysdale et al., 2017) have been linked  
501 to changes in RS connectivity. Alexander-Bloch et al. showed that schizophrenia is associated with reduced modularity in  
502 functional networks with motor areas bilaterally linked to different partitions, and Dysdale et al. used connectivity to identify  
503 four neurophysiological subtypes of depression based on functional connectivity, with two of the types showing markedly  
504 reduced connectivity (vs. ctrl) in nodes within sensory-motor systems we identified .

505 The findings could also have implications for the study of dynamic, time-varying connectivity in healthy and clinical  
506 populations. Knowing that some dynamic changes are associated with phasic states of eye movements would allow better  
507 interpretation of the drivers of time-varying dynamics. An early study of time-varying dynamics (Hutchison, Womelsdorf, Gati,  
508 Everling, & Menon, 2013) is consistent with this possibility. It documented time points presenting phasic, strong connectivity  
509 between frontal eye fields, sensory-motor regions and occipital regions, whereas such connectivity was completely absent at  
510 other time points. This suggests temporary synchronization of multiple brain networks in relation to eye movement.

## 511 **Conclusions**

512 We found that oculomotor-movement provides a systematic contribution to RS connectivity in the human brain. It is correlated  
513 with activity in a brain network that largely involves sensory-motor and visual cortex, as well as the frontal eye fields. Removal  
514 of oculomotor contribution, as quantified via EPI time series sampled from the eye orbit area, produces changes to global  
515 topological features of RS networks. Isolating this contribution can produce a better understanding of activity sources that  
516 organize RS networks in health and disease, and could improve the use of RS network-features in the context of machine  
517 learning.

518 **Appendix**

519 **Supplementary Tables**

| Regressor           | Voxels | Location                    | CM x  | CM y | CM z | Peak x | Peak y | Peak z |
|---------------------|--------|-----------------------------|-------|------|------|--------|--------|--------|
| Blink               | 8      | Left Superior Frontal Gyrus | -22.2 | -5.6 | 74.6 | -21.4  | -3.4   | 73.5   |
| Gaze X <sup>2</sup> | 54     | Left Superior Frontal Gyrus | -16.6 | -0.4 | 70.3 | -14.6  | -3.4   | 70.5   |

**Table 1.** Cluster coordinates of the regions identified by the eye tracking data

|                                    | Time in relation to peak value in eye-tracking series (sec) |       |       |        |        |        |        |        |       |  |
|------------------------------------|-------------------------------------------------------------|-------|-------|--------|--------|--------|--------|--------|-------|--|
|                                    | -10                                                         | -7.5  | -5    | -2.5   | 0      | 2.5    | 5      | 7.5    | 10    |  |
| Velocity of vertical gaze location | 0.146                                                       | 0.245 | 0.313 | 0.338  | 0.328  | 0.280  | 0.205  | 0.117  | 0.031 |  |
| Pupil size squared                 | 0.101                                                       | 0.093 | 0.078 | 0.060  | 0.073  | 0.088  | 0.101  | 0.109  | 0.108 |  |
| Velocity of Gaze Amplitude         | 0.027                                                       | 0.014 | 0.003 | -0.015 | -0.029 | -0.033 | -0.026 | -0.007 | 0.020 |  |

**Table 2.** Numeric values describing kernels mediating the relationship between EO-EPI and eye tracking time series, for those eye tracking features for which the relation was statistically significant.

| Voxels | Location                                    | CM x  | CM y | CM z  | Peak x | Peak y | Peakz | Mean Delta | Mean Z |
|--------|---------------------------------------------|-------|------|-------|--------|--------|-------|------------|--------|
| 18517  | Right Cingulate Gyrus                       | -4.1  | 21.4 | 40.0  | -37.1  | 25.9   | 70.5  | 0.00012    | 3.41   |
| 5144   | Right Lingual Gyrus                         | -2.0  | 68.6 | 7.5   | 10.1   | 66.4   | -1.5  | 0.000151   | 3.23   |
| 2521   | Left Thalamus                               | 2.1   | 19.4 | 12.4  | 1.1    | 23.6   | 13.5  | -0.000117  | -3.29  |
| 1806   | Left Cerebellum/Declive                     | 4.3   | 79.7 | -29.5 | -16.9  | 84.4   | -19.5 | -0.00011   | -3.039 |
| 668    | Right Cerebellum/Inferior Semi-Lunar Lobule | -21.1 | 62.5 | -52.5 | -28.1  | 52.9   | -52.5 | 0.00007    | 3.31   |
| 592    | Left Inferior Parietal Lobule               | 45.1  | 55.7 | 38.3  | 57.4   | 59.6   | 43.5  | -0.000094  | -2.92  |
| 547    | Middle Occipital Gyrus                      | -21.8 | 96.3 | -0.9  | -12.4  | 1.5    | 100.1 | -0.00015   | -3.15  |
| 488    | Left Cerebellum/Inferior Semi-Lunar Lobule  | 21.7  | 62.8 | -52.9 | 21.4   | 64.1   | -52.5 | 0.000068   | 3.21   |

**Table 3.** Cluster mass and peak coordinates of the regions by  $EYE_{com}$ .

| Voxels | Location                    | CM x  | CM y | CM y  | Peak x | Peak y | Peak z | Mean Delta | Mean Z |
|--------|-----------------------------|-------|------|-------|--------|--------|--------|------------|--------|
| 2888   | Cerebellar Vermis           | 0.1   | 27.9 | -12.8 | 3.4    | 43.9   | 4.5    | -0.01313   | -3.12  |
| 1937   | Right Postcentral Gyrus     | -45.8 | 19.2 | 49.7  | -39.4  | 21.4   | 70.5   | 0.01696    | 3.04   |
| 1901   | Left Postcentral Gyrus      | 50.3  | 20.7 | 47    | 43.9   | 21.4   | 67.5   | 0.018062   | 3.07   |
| 631    | Left Cuneus                 | 0.6   | 79.9 | 23.4  | -1.1   | 79.9   | 37.5   | 0.019491   | 2.90   |
| 517    | Left Middle Occipital Gyrus | 47.1  | 70.5 | 3.8   | 52.9   | 70.9   | 13.5   | 0.014119   | 2.80   |

**Table 4.** Cluster mass and peak coordinates of the regions that are identified by  $EYE_{raw}$ .

| Location                    | Mean tSNR | SD of tSNR |
|-----------------------------|-----------|------------|
| Cerebellar Vermis           | 62.58     | 21.35      |
| Right Postcentral Gyrus     | 68.74     | 29.89      |
| Left Postcentral Gyrus      | 66.8      | 29.43      |
| Left Cuneus                 | 78.19     | 34.38      |
| Left Middle Occipital Gyrus | 78.01     | 32.49      |

**Table 5.** Mean tSNR values of the clusters identified by  $EYE_{raw}$

| Location                                    | Mean tSNR | SD of tSNR |
|---------------------------------------------|-----------|------------|
| Right Cingulate Gyrus                       | 67.75     | 28.96      |
| Right Lingual Gyrus                         | 70.06     | 30.53      |
| Left Thalamus                               | 61.26     | 22.71      |
| Left Cerebellum/Declive                     | 45.87     | 25.49      |
| Right Cerebellum/Inferior Semi-Lunar Lobule | 48.76     | 25.30      |
| Left Inferior Parietal Lobule               | 86.02     | 32.38      |
| Middle Occipital Gyrus                      | 45.10     | 25.21      |
| Left Cerebellum/Inferior Semi-Lunar Lobule  | 44.55     | 25.29      |

**Table 6.** Mean tSNR values of the clusters identified by  $EYE_{conv}$ .

|                                   | Sparsity=0.1 |            | Sparsity=0.2 |            | Sparsity=0.3 |            |
|-----------------------------------|--------------|------------|--------------|------------|--------------|------------|
|                                   | Mean raw     | Mean clean | Mean raw     | Mean clean | Mean raw     | Mean clean |
| <b>Max Degree</b>                 | 146.03       | 144.23     | 220.88       | 219.23     | 278.88       | 279.02     |
| <b>Min Degree</b>                 | 0.36         | 0.35       | 3.863        | 3.963      | 13.113       | 13.363     |
| <b>Max Strength</b>               | 91.07        | 88.84      | 119.66       | 117.13     | 135.16       | 132.57     |
| <b>Min Strength</b>               | 0.18         | 0.17       | 1.457        | 1.524      | 3.934        | 4.033      |
| <b>Mean Strength</b>              | 29.74        | 29.45      | 50.09        | 49.48      | 65.367       | 64.464     |
| <b>Max Cluster Coefficient</b>    | 0.672        | 0.668      | 0.529        | 0.522      | 0.442        | 0.434      |
| <b>Min Cluster Coefficient</b>    | 0.004        | 0.003      | 0.061        | 0.063      | 0.111        | 0.112      |
| <b>Mean Cluster Coefficient</b>   | 0.339        | 0.336      | 0.308        | 0.303      | 0.283        | 0.278      |
| <b>Transitivity</b>               | 0.359        | 0.352      | 0.323        | 0.315      | 0.296        | 0.289      |
| <b>Assortativity</b>              | 0.4220       | 0.4207     | 0.354        | 0.349      | 0.305        | 0.298      |
| <b>Efficiency</b>                 | 0.262        | 0.261      | 0.287        | 0.285      | 0.292        | 0.289      |
| <b>Max Number of Community</b>    | 5.57         | 5.55       | 3.938        | 3.963      | 3.475        | 3.500      |
| <b>Maximized Modularity</b>       | 0.44         | 0.45       | 0.353        | 0.358      | 0.300        | 0.303      |
| <b>Max Betweenness Centrality</b> | 6979.50      | 6994.27    | 4529.85      | 4524.27    | 4086.70      | 4059.82    |
| <b>Min Betweenness Centrality</b> | 773.09       | 766.48     | 537.955      | 533.852    | 475.344      | 474.124    |

**Table 7.** Means for network metrics for Raw and Clean (EO-EPI-removed) functional connectivity matrices in different sparsity levels.



520 **Supplementary Figures**

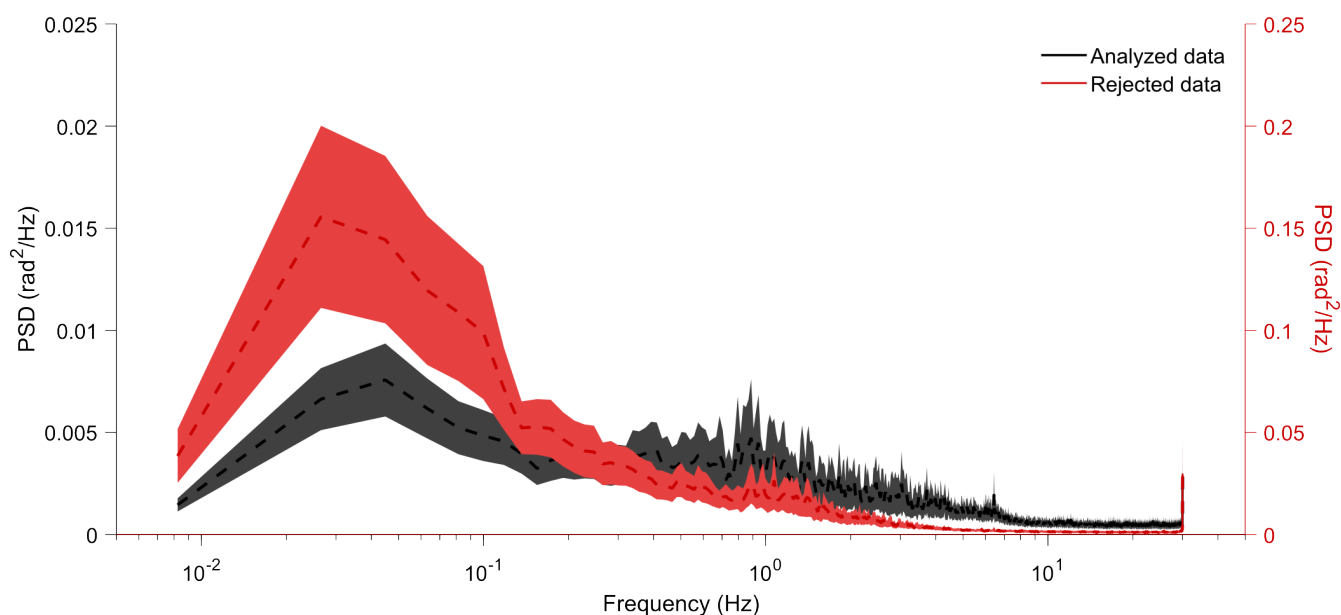

**Figure Appx.1.** Power spectra of eye-tracking data for data rejected or maintained by the quality-control procedure. Note the dual Y-axis scales. Rejected data presented power around one order of magnitude higher than maintained data. This difference was significant even for the highest measurable frequency, where power in rejected data was 2.5 times higher than that maintained.

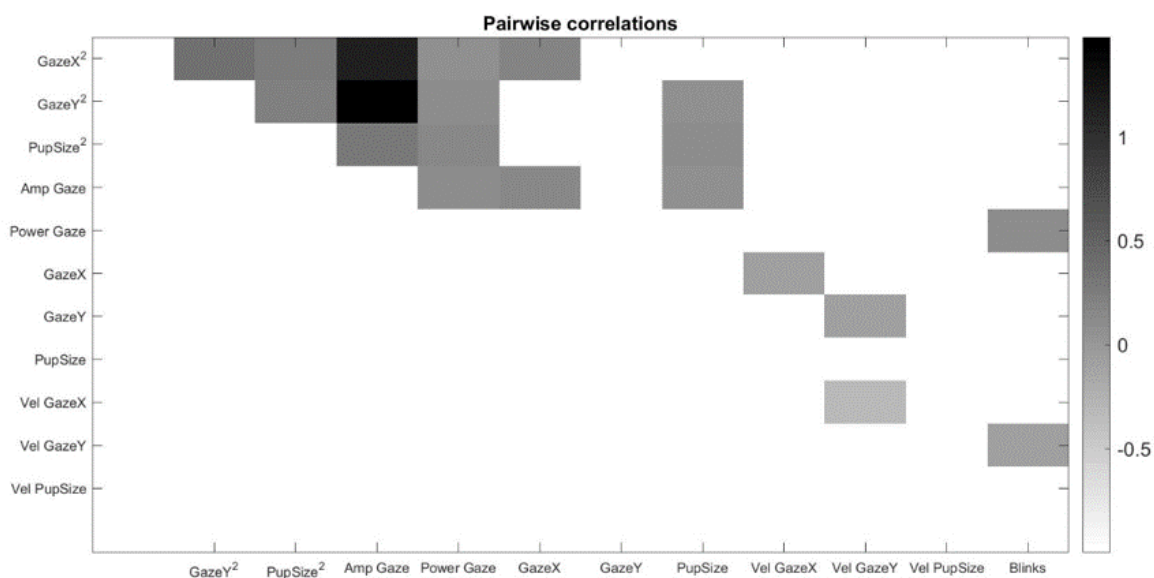

**Figure Appx.2.** Correlation between different eye-tracking metrics. Only statistically significant correlations shown. Correlation between Gaze Power and  $Gaze^2$  or  $Gaze^2$  reflects a spurious correlation as Gaze Power is the sum of those two terms.

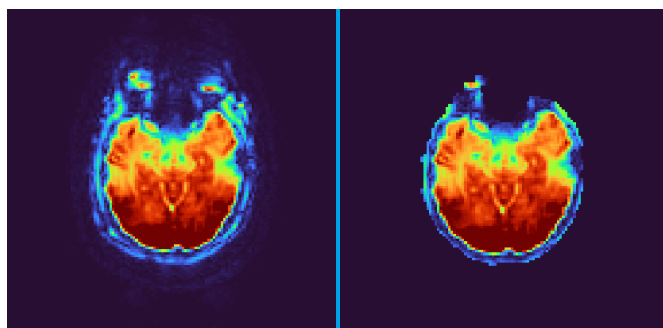

**Figure Appx.3.** Impact of despiking on remaining signal in Eye Orbit area. Left image: without despiking. Right image: despiked.

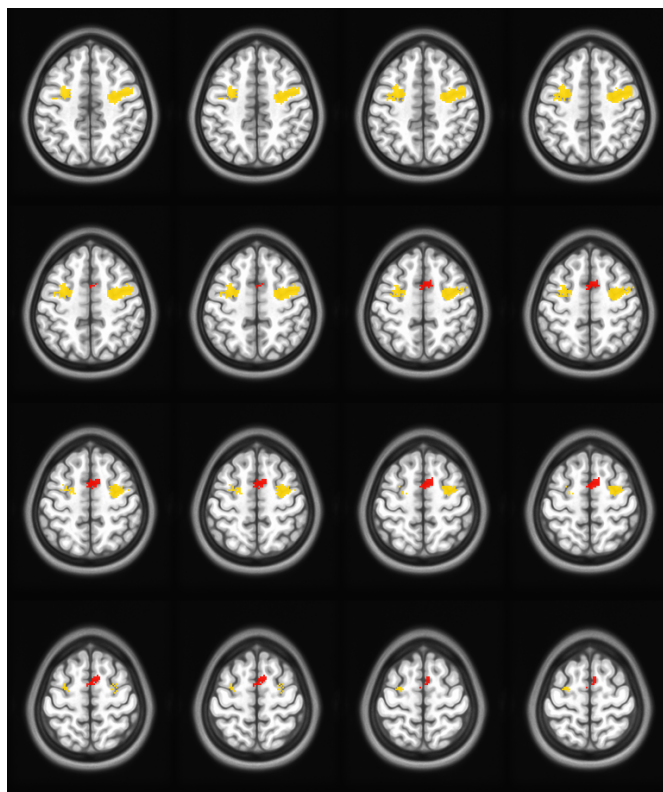

**Figure Appx.4.** FEF (yellow) and SEF (red) ROIs derived from Neurosynth.

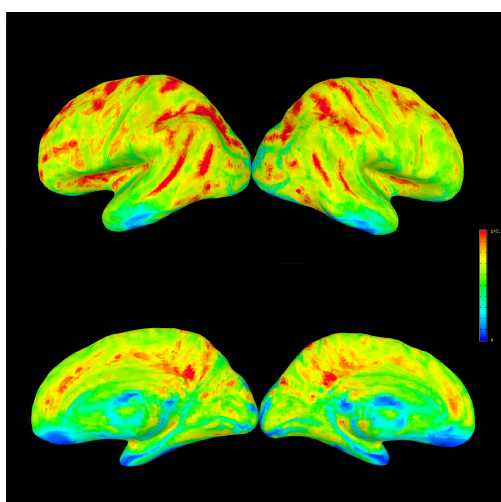

(a)

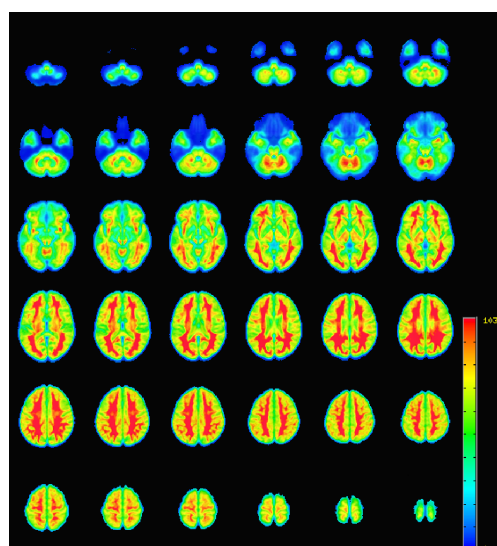

(b)

**Figure Appx.5.** Temporal Signal-To-Noise (tSNR) values presented on Axial (a) and Surface (b) representations. These were calculated as  $Mean/SD$  of the raw time series prior to any pre-processing

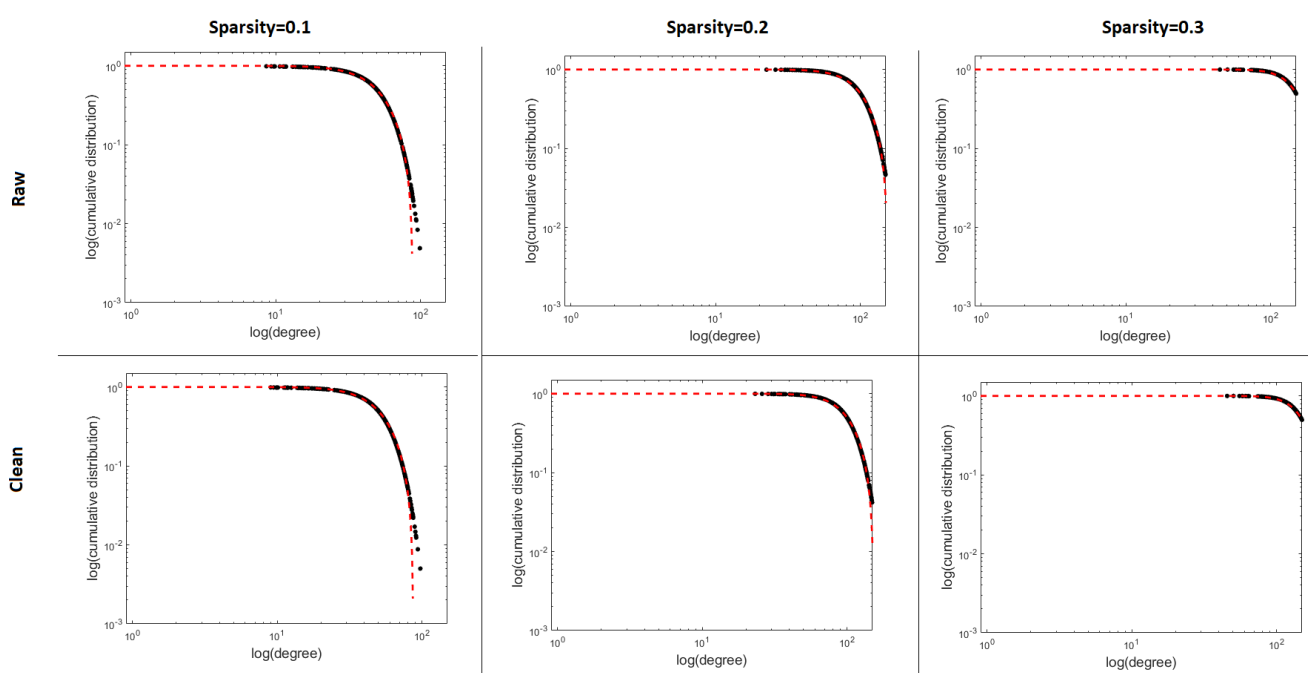

**Figure Appx.6.** Mean degree distribution of raw and clean matrices across sparsity levels.

## 521 **Description of chosen network metrics**

- 522 • **Degree:** Node degree is the number of links connected to the node. In directed networks, the in-degree is the number of  
523 inward links and the out-degree is the number of outward links. Connection weights are ignored in calculations.
- 524 • **Strength:** Node strength is the sum of weights of links connected to the node. In directed networks, the in-strength is the  
525 sum of inward link weights and the out-strength is the sum of outward link weights.
- 526 • **Clustering coefficient:** The clustering coefficient is the fraction of triangles around a node and is equivalent to the  
527 fraction of node's neighbors that are neighbors of each other.
- 528 • **Transitivity:** The transitivity is the ratio of triangles to triplets in the network and is an alternative to the clustering  
529 coefficient.
- 530 • **Assortativity:** The assortativity coefficient is a correlation coefficient between the degrees of all nodes on two opposite  
531 ends of a link. A positive assortativity coefficient indicates that nodes tend to link to other nodes with the same or similar  
532 degree.
- 533 • **Global Efficiency :** The global efficiency is the average inverse shortest path length in the network, and is inversely  
534 related to the characteristic path length.
- 535 • **Number of communities:** The optimal community structure is a subdivision of the network into nonoverlapping groups  
536 of nodes in a way that maximizes the number of within-group edges, and minimizes the number of between-group edges.  
537 To calculate maximum number of community for each network, we recorded the largest number of community.
- 538 • **Modularity:** The modularity is a statistic that quantifies the degree to which the network may be subdivided into such  
539 clearly delineated groups.
- 540 • **Betweenness Centrality:** Node betweenness centrality is the fraction of all shortest paths in the network that contains a  
541 given node. Nodes with high values of betweenness centrality participate in a large number of shortest paths

## 542 **Acknowledgments**

543 The authors are grateful to the Sleepy Brain project team for openly sharing the data, to staff physicist Rouslan Sitnikov for  
544 technical advice, and to Jorge Jovicich for assistance in assessment of ghosting artifacts.

## 545 Notes

546 <sup>1</sup>This mis-measurement is known as the Pupil Foreshortening Error (PFE). For example, Hayes and Petrov (2016) showed that deviations from center of  
548 camera-view produce systematic PFEs that can reach  $\sim 12\%$  at typical viewing distances. Significant PFEs were produced even with movements as small as  
549  $\sim 4^\circ$  of center.

550 <sup>2</sup>All data available online at <https://www.openneuro.org/datasets/ds000201/>

551 <sup>3</sup>*Pupil\_size* was defined as  $(pupil\_width + pupil\_height)/2$ ; we note that with our instrumentation (as well as many other eye trackers), pupil size is  
552 confounded with gaze position (Hayes & Petrov, 2016), resulting in significant correlations between *pupil\_size* and the gaze both in  $x$  and  $y$  directions ( $p < .01$   
553 in 30/32 subjects).

## 554 References

- 555 Agtzidis, I., Meyhöfer, I., Dorr, M., & Lencer, R. (2020). Following forrest gump: Smooth pursuit related brain activation  
556 during free movie viewing. *NeuroImage*, 116491.
- 557 Alexander-Bloch, A., Lambiotte, R., Roberts, B., Giedd, J., Gogtay, N., & Bullmore, E. (2012). The discovery of population  
558 differences in network community structure: New methods and applications to brain functional networks in schizophrenia.  
559 *Neuroimage*, 59(4), 3889–3900.
- 560 Avants, B. B., Tustison, N., & Song, G. (2011). Advanced Normalization Tools (ANTs) Brian B. Avants, Nick Tustison and  
561 Gang Song, 1–35. Retrieved from [www.picsl.upenn.edu/ANTs](http://www.picsl.upenn.edu/ANTs).
- 562 Balslev, D., Albert, N. B., & Miall, C. (2011). Eye muscle proprioception is represented bilaterally in the sensorimotor cortex.  
563 *Human brain mapping*, 32(4), 624–631.
- 564 Beauchamp, M. S. (2003). Detection of eye movements from fmri data. *Magnetic Resonance in Medicine*, 49(2), 376–380.  
565 Read. doi:[10.1002/mrm.10345](https://doi.org/10.1002/mrm.10345)
- 566 Becker, W., & Fuchs, A. (1969). Further properties of the human saccadic system: Eye movements and correction saccades  
567 with and without visual fixation points. *Vision Research*, 9(10), 1247–1258. read. doi:[10.1016/0042-6989\(69\)90112-6](https://doi.org/10.1016/0042-6989(69)90112-6)
- 568 Beckmann, C., Mackay, C., Filippini, N., & Smith, S. (2009). Group comparison of resting-state FMRI data using multi-subject  
569 ICA and dual regression. *NeuroImage*. doi:[10.1016/s1053-8119\(09\)71511-3](https://doi.org/10.1016/s1053-8119(09)71511-3)
- 570 Birn, R. M. (2012). The role of physiological noise in resting-state functional connectivity. *Neuroimage*, 62(2), 864–870.
- 571 Brodoehl, S., Witte, O. W., & Klingner, C. M. (2016). Measuring eye states in functional mri. *BMC Neuroscience*, 17(1). Read.  
572 doi:[10.1186/s12868-016-0282-7](https://doi.org/10.1186/s12868-016-0282-7)
- 573 Brown, M. R., Goltz, H. C., Vilis, T., Ford, K. A., & Everling, S. (2006). Inhibition and generation of saccades: Rapid  
574 event-related fmri of prosaccades, antisaccades, and nogo trials. *NeuroImage*, 33(2), 644–659. doi:[10.1016/j.neuroimage.2006.07.002](https://doi.org/10.1016/j.neuroimage.2006.07.002)
- 575
- 576 Chen, G., Saad, Z. S., Nath, A. R., Beauchamp, M. S., & Cox, R. W. (2012). Fmri group analysis combining effect estimates  
577 and their variances. *Neuroimage*, 60(1), 747–765.
- 578 Chen, J., Lewis, L., Chang, C., Tian, Q., Fultz, N., Ohringer, N., . . . Polimeni, J. (2020). Resting-state “physiological networks”.  
579 *NeuroImage*, 116707.
- 580 Chen, W., & Zhu, X.-H. (1997). Suppression of physiological eye movement artifacts in functional mri using slab presaturation.  
581 *Magnetic Resonance in Medicine*, 38(4), 546–550. Read. doi:[10.1002/mrm.1910380407](https://doi.org/10.1002/mrm.1910380407)
- 582 Cox, R. W. (1996). AFNI: Software for analysis and visualization of functional magnetic resonance neuroimages. *Computers  
583 and Biomedical Research*, 29(3), 162–173. doi:[10.1006/cbmr.1996.0014](https://doi.org/10.1006/cbmr.1996.0014)
- 584 de Vos, F., Koini, M., Schouten, T. M., Seiler, S., van der Grond, J., Lechner, A., . . . Rombouts, S. A. (2018). A comprehensive  
585 analysis of resting state fmri measures to classify individual patients with alzheimer’s disease. *Neuroimage*, 167, 62–72.
- 586 Drysdale, A. T., Grosenick, L., Downar, J., Dunlop, K., Mansouri, F., Meng, Y., . . . Etkin, A., et al. (2017). Resting-state  
587 connectivity biomarkers define neurophysiological subtypes of depression. *Nature medicine*, 23(1), 28.
- 588 Dubois, J., Galdi, P., Paul, L. K., & Adolphs, R. (2018). A distributed brain network predicts general intelligence from resting-  
589 state human neuroimaging data. *Philosophical Transactions of the Royal Society B: Biological Sciences*, 373(1756),  
590 20170284.
- 591 Fonov, V., Evans, A., McKinstry, R., Almlí, C., & Collins, D. (2009). Unbiased nonlinear average age-appropriate brain  
592 templates from birth to adulthood. *NeuroImage*. doi:[10.1016/s1053-8119\(09\)70884-5](https://doi.org/10.1016/s1053-8119(09)70884-5)
- 593 Fornito, A., Zalesky, A., & Bullmore, E. T. (2010). Network scaling effects in graph analytic studies of human resting-state  
594 fmri data. *Frontiers in systems neuroscience*, 4, 22.
- 595 Fox, M. D., Corbetta, M., Snyder, A. Z., Vincent, J. L., & Raichle, M. E. (2006). Spontaneous neuronal activity distinguishes  
596 human dorsal and ventral attention systems. *Proceedings of the National Academy of Sciences*, 103(26), 10046–10051.
- 597 Fransson, P., Flodin, P., Seimyr, G. Ö., & Pansell, T. (2014). Slow fluctuations in eye position and resting-state functional  
598 magnetic resonance imaging brain activity during visual fixation. *European Journal of Neuroscience*, 40(12), 3828–3835.  
599 Read. doi:[10.1111/ejn.12745](https://doi.org/10.1111/ejn.12745)
- 600 Hallquist, M. N., & Hillary, F. G. (2018). Graph theory approaches to functional network organization in brain disorders: A  
601 critique for a brave new small-world. *Network Neuroscience*, 3(1), 1–26.
- 602 Han, K., Mac Donald, C. L., Johnson, A. M., Barnes, Y., Wierzechowski, L., Zonies, D., . . . Raichle, M. E., et al. (2014).  
603 Disrupted modular organization of resting-state cortical functional connectivity in us military personnel following  
604 concussive ‘mild’blast-related traumatic brain injury. *Neuroimage*, 84, 76–96.
- 605 Hayes, T. R., & Petrov, A. A. (2016). Mapping and correcting the influence of gaze position on pupil size measurements.  
606 *Behavior Research Methods*, 48(2), 510–527. read. doi:[10.3758/s13428-015-0588-x](https://doi.org/10.3758/s13428-015-0588-x)

- 607 Honey, C., Sporns, O., Cammoun, L., Gigandet, X., Thiran, J.-P., Meuli, R., & Hagmann, P. (2009). Predicting human resting-  
608 state functional connectivity from structural connectivity. *Proceedings of the National Academy of Sciences*, *106*(6),  
609 2035–2040.
- 610 Hutchison, R. M., Womelsdorf, T., Gati, J. S., Everling, S., & Menon, R. S. (2013). Resting-state networks show dynamic  
611 functional connectivity in awake humans and anesthetized macaques. *Human brain mapping*, *34*(9), 2154–2177.
- 612 Jenkinson, M., Beckmann, C. F., Behrens, T. E., Woolrich, M. W., & Smith, S. M. (2012). Fsl. *Neuroimage*, *62*(2), 782–790.  
613 doi:[10.1016/j.neuroimage.2011.09.015](https://doi.org/10.1016/j.neuroimage.2011.09.015). arXiv: [arXiv:1401.4122v2](https://arxiv.org/abs/1401.4122v2)
- 614 Kelly, A. C., Uddin, L. Q., Biswal, B. B., Castellanos, F. X., & Milham, M. P. (2008). Competition between functional brain  
615 networks mediates behavioral variability. *Neuroimage*, *39*(1), 527–537.
- 616 Kim, J., Criaud, M., Cho, S. S., Diez-Cirarda, M., Mihaescu, A., Coakeley, S., . . . Houle, S., et al. (2017). Abnormal intrinsic  
617 brain functional network dynamics in parkinson’s disease. *Brain*, *140*(11), 2955–2967.
- 618 Law, I. (1998). Parieto-occipital cortex activation during self-generated eye movements in the dark. *Brain*, *121*(11), 2189–2200.  
619 read1. doi:[10.1093/brain/121.11.2189](https://doi.org/10.1093/brain/121.11.2189)
- 620 Marx, E., Stephan, T., Nolte, A., Deuschländer, A., Seelos, K. C., Dieterich, M., & Brandt, T. (2003). Eye closure in darkness  
621 animates sensory systems. *Neuroimage*, *19*(3), 924–934.
- 622 McAvoy, M., Larson-Prior, L., Ludwikow, M., Zhang, D., Snyder, A. Z., Gusnard, D. L., . . . d’Avossa, G. (2012). Dissociated  
623 mean and functional connectivity bold signals in visual cortex during eyes closed and fixation. *Journal of neurophysiology*,  
624 *108*(9), 2363–2372.
- 625 Mišić, B., Betzel, R. F., De Reus, M. A., Van Den Heuvel, M. P., Berman, M. G., McIntosh, A. R., & Sporns, O. (2016).  
626 Network-level structure-function relationships in human neocortex. *Cerebral Cortex*, *26*(7), 3285–3296.
- 627 Mort, D. J., Perry, R. J., Mannan, S. K., Hodgson, T. L., Anderson, E., Quest, R., . . . Kennard, C. (2003). Differential cortical  
628 activation during voluntary and reflexive saccades in man. *NeuroImage*, *18*(2), 231–246. read. ok intro. doi:[10.1016/S1053-  
629 8119\(02\)00028-9](https://doi.org/10.1016/S1053-8119(02)00028-9)
- 630 Nickerson, L. D., Smith, S. M., Öngür, D., & Beckmann, C. F. (2017). Using dual regression to investigate network shape and  
631 amplitude in functional connectivity analyses. *Frontiers in Neuroscience*. doi:[10.3389/fnins.2017.00115](https://doi.org/10.3389/fnins.2017.00115)
- 632 Nilsson, G., Tamm, S., D’Onofrio, P., Thuné, H. Å., Schwarz, J., Lavebratt, C., . . . Åkerstedt, T. (2016). A multimodal brain  
633 imaging dataset on sleep deprivation in young and old humans, 1–27. Retrieved from [https://openarchive.ki.se/xmlui/  
634 handle/10616/45181](https://openarchive.ki.se/xmlui/handle/10616/45181)
- 635 Nostro, A. D., Müller, V. I., Varikuti, D. P., Pläschke, R. N., Hoffstaedter, F., Langner, R., . . . Eickhoff, S. B. (2018). Predicting  
636 personality from network-based resting-state functional connectivity. *Brain Structure and Function*, *223*(6), 2699–2719.
- 637 Parkes, L., Fulcher, B., Yücel, M., & Fornito, A. (2018). An evaluation of the efficacy, reliability, and sensitivity of motion  
638 correction strategies for resting-state functional mri. *Neuroimage*, *171*, 415–436.
- 639 Pretegianni, E., & Optican, L. M. (2017). Eye movements in parkinson’s disease and inherited parkinsonian syndromes. *Frontiers  
640 in neurology*, *8*, 592.
- 641 Ramot, M., Wilf, M., Goldberg, H., Weiss, T., Deouell, L. Y., & Malach, R. (2011). Coupling between spontaneous (resting state)  
642 fMRI fluctuations and human oculo-motor activity. *NeuroImage*, *58*(1), 213–225. doi:[10.1016/j.neuroimage.2011.06.015](https://doi.org/10.1016/j.neuroimage.2011.06.015)
- 643 Rorden, C., Karnath, H. O., & Bonilha, L. (2007). Improving lesion-symptom mapping. *Journal of Cognitive Neuroscience*.  
644 doi:[10.1162/jocn.2007.19.7.1081](https://doi.org/10.1162/jocn.2007.19.7.1081)
- 645 Rosenberg, M. D., Hsu, W.-T., Scheinost, D., Constable, T. R., & Chun, M. M. (2018). Connectome-based models predict  
646 separable components of attention in novel individuals. *Journal of Cognitive Neuroscience*, *30*(2), 160–173.
- 647 Rubinov, M., & Sporns, O. (2010). Complex network measures of brain connectivity: Uses and interpretations. *NeuroImage*.  
648 doi:[10.1016/j.neuroimage.2009.10.003](https://doi.org/10.1016/j.neuroimage.2009.10.003)
- 649 Rudie, J. D., Brown, J., Beck-Pancer, D., Hernandez, L., Dennis, E., Thompson, P., . . . Dapretto, M. (2013). Altered functional  
650 and structural brain network organization in autism. *NeuroImage: clinical*, *2*, 79–94.
- 651 Schaefer, A., Kong, R., Gordon, E. M., Laumann, T. O., Zuo, X.-N., Holmes, A. J., . . . Yeo, B. T. T. (2018). Local-Global  
652 Parcellation of the Human Cerebral Cortex from Intrinsic Functional Connectivity MRI. *Cerebral Cortex*. doi:[10.1093/  
653 cercor/bhx179](https://doi.org/10.1093/cercor/bhx179)
- 654 Shirer, W. R., Ryali, S., Rykhlevskaia, E., Menon, V., & Greicius, M. D. (2012). Decoding subject-driven cognitive states with  
655 whole-brain connectivity patterns. *Cerebral Cortex*. doi:[10.1093/cercor/bhr099](https://doi.org/10.1093/cercor/bhr099)
- 656 Siegel, S., & Castellan, N. J. (1956). *Nonparametric statistics for the behavioral sciences*. McGraw-hill New York.
- 657 Smith, S. M., Beckmann, C. F. [Christian F], Andersson, J., Auerbach, E. J., Bijsterbosch, J., Douaud, G., . . . Harms, M. P.,  
658 et al. (2013). Resting-state fmri in the human connectome project. *Neuroimage*, *80*, 144–168.
- 659 Son, J., Ai, L., Lim, R., Xu, T., Colcombe, S., Franco, A. R., . . . Milham, M. (2019). Evaluating fmri-based estimation of eye  
660 gaze during naturalistic viewing. *Cerebral Cortex*. doi:[10.1093/cercor/bhz157](https://doi.org/10.1093/cercor/bhz157)



- 661 Takarae, Y., Minshew, N. J., Luna, B., Krisky, C. M., & Sweeney, J. A. (2004). Pursuit eye movement deficits in autism. *Brain*,  
662 *127*(12), 2584–2594.
- 663 West, G. L., Welsh, T. N., & Pratt, J. (2009). Saccadic trajectories receive online correction: Evidence for a feedback-based  
664 system of oculomotor control. *Journal of Motor Behavior*, *41*(2), 117–127.
- 665 Xu, P., Huang, R., Wang, J., Van Dam, N. T., Xie, T., Dong, Z., . . . jia Luo, Y. (2014). Different topological organization of  
666 human brain functional networks with eyes open versus eyes closed. *NeuroImage*, *90*, 246–255. doi:[10.1016/j.neuroimage.  
667 2013.12.060](https://doi.org/10.1016/j.neuroimage.2013.12.060)
- 668 Yarkoni, T., Poldrack, R. A., Nichols, T. E., Van Essen, D. C., & Wager, T. D. (2011). Large-scale automated synthesis of  
669 human functional neuroimaging data. *Nature Methods*. doi:[10.1038/nmeth.1635](https://doi.org/10.1038/nmeth.1635)
- 670 Yellin, D., Berkovich-Ohana, A., & Malach, R. (2015). Coupling between pupil fluctuations and resting-state fmri uncovers a  
671 slow build-up of antagonistic responses in the human cortex. *NeuroImage*, *106*, 414–427. Read. doi:[10.1016/j.neuroimage.  
672 2014.11.034](https://doi.org/10.1016/j.neuroimage.2014.11.034)
- 673 Zacà, D., Hasson, U., Minati, L., & Jovicich, J. (2018). Method for retrospective estimation of natural head movement during  
674 structural mri. *Journal of Magnetic Resonance Imaging*, *48*(4), 927–937.
- 675 Zhang, Y., Yan, A., Liu, B., Wan, Y., Zhao, Y., Liu, Y., . . . Liu, Z. (2018). Oculomotor performances are associated with motor  
676 and non-motor symptoms in parkinson’s disease. *Frontiers in neurology*, *9*, 960.
